# Supplementary material for: Short- and Long-term Outcomes of children hospitalized with COVID-19 or Influenza: results of the AUTCOV study
Source: bioRxiv or medRxiv preprint supplement (doi:10.1101/2024.08.28.24312702), 2024-08-28
Supplement: Supplementary file [file media-1.pdf]

## Supplementary Files to

# Short- and Long-term Outcomes of children hospitalized with COVID-19 or Influenza: results of the AUTCOV study

Christine Wagenlechner<sup>1,2\*</sup>, Ralph Wendt<sup>3\*</sup>, Berthold Reichardt<sup>4</sup>, Michael Mildner<sup>5</sup>, Julia Mascherbauer<sup>6</sup>, Clemens Aigner<sup>2</sup>, Johann Auer<sup>7</sup>, Hendrik Jan Ankersmit<sup>2,8#</sup>, Alexandra Christine Graf<sup>1\*</sup>

<sup>1</sup> Center for Medical Data Science, Medical University of Vienna, Spitalgasse 23, 1090 Vienna, Austria

<sup>2</sup> Clinic of Thoracic Surgery, Medical University of Vienna, Spitalgasse 23, 1090 Vienna, Austria

<sup>3</sup> Department of Nephrology, Hospital St. Georg Leipzig, Delitzscher Street. 141, 04129 Leipzig, Germany

<sup>4</sup> Austrian Social Health Insurance Fund, Siegfried Marcus-Straße 5, 7000 Eisenstadt, Austria.

<sup>5</sup> Clinic of Dermatology, Medical University of Vienna, Spitalgasse 23, 1090 Vienna, Austria

<sup>6</sup> Department of Internal Medicine 3, University Hospital St. Poelten, Dunant-Platz 1, 3100 St. Poelten, Austria

<sup>7</sup> Department of Internal Medicine 1 with Cardiology and Intensive Care, St. Josef Hospital Braunau, Ringstraße 60, 5280 Braunau am Inn, Austria

<sup>8</sup> Laboratory for Cardiac and Thoracic Diagnosis, Regeneration and Applied Immunology, Spitalgasse 23, 1090 Vienna, Austria

# Correspondence to [hendrik.ankersmit@meduniwien.ac.at](mailto:hendrik.ankersmit@meduniwien.ac.at) ; Phone +43 1 40400 67770

\* contributed equally

Note that data regarding adults (patients and controls >18 years of age) of the AUTCOV study are published on medRxiv, see Graf AC., Reichardt B., Wagenlechner C., Krotka P., Traxler-Weidenauer D., Mildner M., Mascherbauer J., Aigner C., Auer J., Wendt R., Ankersmit HJ. “Baseline drug treatments and long-term outcomes in COVID-19 hospitalized patients: results of the 2020 AUTCOV study” (2024), doi: <https://doi.org/10.1101/2024.08.22.24312424>

Definitions of Medications Groups and Outcomes presented in the corresponding supplement also available on medRxiv are therefore similar to them presented below. Presented definitions on medication groups are used for the entire AUTCOV study and its publications.

## Definitions of primary and secondary outcome

This study includes all patients aged 0 to 18 years who were hospitalized in Austria due to the main diagnosis COVID-19 (ICD-10 Codes U071, U072, U049) from 1 January 2020 to 31 December 2021 and Influenza (ICD-10 Codes J09, J100, J101, J108, J110, J111, J118, J10) from 30 December 2015 to 31 December 2021. The patient data were available from the Austrian Health Insurance Funds. The data set includes 1063 COVID-19 patients and 2781 Influenza patients.

For both groups (COVID and INFLUENZA), age-, sex-, and region-matched control groups (approximately 10 controls for each patient) consisted of individuals not hospitalized due to COVID-19 (in the years 2020 and 21) as well as Influenza (in the years 2015 – 2021) were randomly chosen from the population registered in the Austrian Health Insurance Fund, representing the Austrian population. Data on the control group were available from 1 year before the first matched patient was hospitalized until study cut-off. Death dates were available at study cut-off.

**Table S1. Definitions of primary and secondary outcomes**

| Outcome                                                  | Definition                                                                                                                                                                                                                                |
|----------------------------------------------------------|-------------------------------------------------------------------------------------------------------------------------------------------------------------------------------------------------------------------------------------------|
| <b>Hospital Discharge (primary outcome)</b>              | Hospital discharge after first COVID-19 or Influenza hospital admission.<br>Time from COVID-19/Influenza hospital admission to hospital discharge.                                                                                        |
| <b>In-hospital death (secondary outcome)</b>             | for patients: death during COVID-19/Influenza index hospital stay:<br>YES/NO<br>for controls: death within the time of COVID-19/Influenza hospital stay of the age-, sex and region-matched COVID-19 patient: YES/NO                      |
| <b>All-cause mortality (secondary outcome)</b>           | for patients: time from COVID-19/Influenza hospital admission to death or last follow-up<br>for controls: time from COVID-19/Influenza hospital admission of the age-, sex and region-matched COVID-19 patient to death or last follow-up |
| <b>Readmission due to any reason (secondary outcome)</b> | time from (alive) COVID-19/Influenza hospital discharge to the first hospital admission (due to any reason) after index hospital stay                                                                                                     |

## Definitions of confounder

For the statistical models separately for COVID-19 and for Influenza patients, the confounder wave was defined as follows:

For COVID-19 patients, the confounder 'wave' indicates the period during which patients were hospitalised for COVID between January to December 2020, January to June 2021 or July to December 2021.

For influenza patients, the confounder 'wave' was specified for rehospitalisation in the categories January 2016 to June 2017, July 2017 to December 2019 and January 2019 to December 2021, and for discharge in the categories January to June 2016, July 2016 to June 2017, July 2017 to June 2018, July 2018 to June 2019, June 2019 to July 2020, July 2020 to June 2021 and July to December 2021.

ATC codes describing prescribed medication were available from the Austrian Health Insurance Funds 1 year before the hospitalisation due to COVID-19 or Influenza. ATC codes for medications before hospitalisation were summarized into medication groups (**Table S2**) using binary variables, which were set to 1 if the patient received at least one medicament from the corresponding medication group at least once in the year before COVID-19 or Influenza hospitalisation. Not all medication groups were considered in the statistical models due to underrepresentation.

**Table S2: Definitions of medication groups**

| Medication group                                                       | ATC codes                                                                                                                                                                                                                                                                                                                                                                                                                                                                                                                                                                                                                                                                                                                                                                                                                                                                                                                                                                                                                                                                                                                                                                                                                                                                                                                                                                                                                                                                                                                                                                                                                                                                                                                                                                                                                                                                                                                                                                                                                                                                                                                                                                                                                                                                                                                                                                                                                                                                                                                                                                                                                                                                                                                                                               |
|------------------------------------------------------------------------|-------------------------------------------------------------------------------------------------------------------------------------------------------------------------------------------------------------------------------------------------------------------------------------------------------------------------------------------------------------------------------------------------------------------------------------------------------------------------------------------------------------------------------------------------------------------------------------------------------------------------------------------------------------------------------------------------------------------------------------------------------------------------------------------------------------------------------------------------------------------------------------------------------------------------------------------------------------------------------------------------------------------------------------------------------------------------------------------------------------------------------------------------------------------------------------------------------------------------------------------------------------------------------------------------------------------------------------------------------------------------------------------------------------------------------------------------------------------------------------------------------------------------------------------------------------------------------------------------------------------------------------------------------------------------------------------------------------------------------------------------------------------------------------------------------------------------------------------------------------------------------------------------------------------------------------------------------------------------------------------------------------------------------------------------------------------------------------------------------------------------------------------------------------------------------------------------------------------------------------------------------------------------------------------------------------------------------------------------------------------------------------------------------------------------------------------------------------------------------------------------------------------------------------------------------------------------------------------------------------------------------------------------------------------------------------------------------------------------------------------------------------------------|
| <b>Anticoagulants (MG1)</b>                                            | B01AA01, B01AA02, B01AA03, B01AA04, B01AA07, B01AA08, B01AA09, B01AA10, B01AA11, B01AA12, B01AB01, B01AB02, B01AB04, B01AB05, B01AB06, B01AB07, B01AB08, B01AB09, B01AB10, B01AB11, B01AB12, B01AB51, B01AC01, B01AC02, B01AC03, B01AC04, B01AC05, B01AC06, B01AC07, B01AC08, B01AC09, B01AC10, B01AC11, B01AC13, B01AC14, B01AC15, B01AC16, B01AC17, B01AC18, B01AC19, B01AC21, B01AC22, B01AC23, B01AC24, B01AC25, B01AC27, B01AC30, B01AC56, B01AD01, B01AD02, B01AD03, B01AD04, B01AD05, B01AD06, B01AD07, B01AD08, B01AD09, B01AD10, B01AD11, B01AD12, B01AE01, B01AE02, B01AE03, B01AE04, B01AE05, B01AE06, B01AE07, B01AF01, B01AF02, B01AF03, B01AF04, B01AX01, B01AX04, B01AX05, B01AX06                                                                                                                                                                                                                                                                                                                                                                                                                                                                                                                                                                                                                                                                                                                                                                                                                                                                                                                                                                                                                                                                                                                                                                                                                                                                                                                                                                                                                                                                                                                                                                                                                                                                                                                                                                                                                                                                                                                                                                                                                                                                       |
| <b>Antibiotics, antivirals, antiprotozoals, or anthelmintics (MG2)</b> | A07AA01, A07AA02, A07AA03, A07AA04, A07AA05, A07AA06, A07AA07, A07AA08, A07AA09, A07AA10, A07AA11, A07AA12, A07AA13, A07AA51, A07AA54, A07AB02, A07AB03, A07AB04, A07AC01, J01AA01, J01AA02, J01AA03, J01AA04, J01AA05, J01AA06, J01AA07, J01AA08, J01AA09, J01AA10, J01AA11, J01AA12, J01AA13, J01AA14, J01AA15, J01AA20, J01AA56, J01BA01, J01BA02, J01BA52, J01CA01, J01CA02, J01CA03, J01CA04, J01CA05, J01CA06, J01CA07, J01CA08, J01CA09, J01CA10, J01CA11, J01CA12, J01CA13, J01CA14, J01CA15, J01CA16, J01CA17, J01CA18, J01CA19, J01CA20, J01CA51, J01CE01, J01CE02, J01CE03, J01CE04, J01CE05, J01CE06, J01CE07, J01CE08, J01CE09, J01CE10, J01CE30, J01CF01, J01CF02, J01CF03, J01CF04, J01CF05, J01CG01, J01CG02, J01CR01, J01CR02, J01CR03, J01CR04, J01CR05, J01CR50, J01DA01, J01DA02, J01DA03, J01DA04, J01DA05, J01DA06, J01DA07, J01DA08, J01DA09, J01DA10, J01DA11, J01DA12, J01DA13, J01DA14, J01DA15, J01DA16, J01DA17, J01DA18, J01DA19, J01DA21, J01DA22, J01DA23, J01DA24, J01DA25, J01DA26, J01DA27, J01DA30, J01DA31, J01DA32, J01DA33, J01DA34, J01DA35, J01DA36, J01DA37, J01DA38, J01DA39, J01DA40, J01DA41, J01DA42, J01DA63, J01DB01, J01DB02, J01DB03, J01DB04, J01DB05, J01DB06, J01DB07, J01DB08, J01DB09, J01DB10, J01DB11, J01DB12, J01DC01, J01DC02, J01DC03, J01DC04, J01DC05, J01DC06, J01DC07, J01DC08, J01DC09, J01DC10, J01DC11, J01DC12, J01DC13, J01DC14, J01DD01, J01DD02, J01DD03, J01DD04, J01DD05, J01DD06, J01DD07, J01DD08, J01DD09, J01DD10, J01DD11, J01DD12, J01DD13, J01DD14, J01DD15, J01DD16, J01DD18, J01DD52, J01DD54, J01DD62, J01DD63, J01DD64, J01DE01, J01DE02, J01DF01, J01DF02, J01DH02, J01DH03, J01DH04, J01DH06, J01DH51, J01DH52, J01DH55, J01DH56, J01DI01, J01DI02, J01DI04, J01DI54, J01EA01, J01EA02, J01EB01, J01EB02, J01EB03, J01EB04, J01EB05, J01EB06, J01EB07, J01EB08, J01EB20, J01EC01, J01EC02, J01EC03, J01EC20, J01ED01, J01ED02, J01ED03, J01ED04, J01ED05, J01ED06, J01ED07, J01ED08, J01ED09, J01ED20, J01EE01, J01EE02, J01EE03, J01EE04, J01EE05, J01EE06, J01EE07, J01FA01, J01FA02, J01FA03, J01FA05, J01FA06, J01FA07, J01FA08, J01FA09, J01FA10, J01FA11, J01FA12, J01FA13, J01FA14, J01FA15, J01FF01, J01FF02, J01FG01, J01FG02, J01GA01, J01GA02, J01GB01, J01GB03, J01GB04, J01GB05, J01GB06, J01GB07, J01GB08, J01GB09, J01GB10, J01GB11, J01GB12, J01GB13, J01GB14, J01MA01, J01MA02, J01MA03, J01MA04, J01MA05, J01MA06, J01MA07, J01MA08, J01MA09, J01MA10, J01MA11, J01MA12, J01MA13, J01MA14, J01MA15, J01MA16, J01MA17, J01MA18, J01MA19, J01MA21, J01MA22, J01MA23, J01MA24, J01MB01, J01MB02, J01MB03, J01MB04, J01MB05, J01MB06, J01MB07, J01RA01, J01RA02, J01RA03, J01RA04, J01XA01, J01XA02, J01XA03, J01XA04, J01XA05, J01XB01, J01XB02, J01XC01, J01XD01, |

|                                                                                                         |                                                                                                                                                                                                                                                                                                                                                                                                                                                                                                                                                                                                                                                                                                                                                                                                                                                                                                                                                                                                                                                                                                                                                                                                                                                                                                                                                                                                                                                                                                                                                                                                                                                                                                                                                          |
|---------------------------------------------------------------------------------------------------------|----------------------------------------------------------------------------------------------------------------------------------------------------------------------------------------------------------------------------------------------------------------------------------------------------------------------------------------------------------------------------------------------------------------------------------------------------------------------------------------------------------------------------------------------------------------------------------------------------------------------------------------------------------------------------------------------------------------------------------------------------------------------------------------------------------------------------------------------------------------------------------------------------------------------------------------------------------------------------------------------------------------------------------------------------------------------------------------------------------------------------------------------------------------------------------------------------------------------------------------------------------------------------------------------------------------------------------------------------------------------------------------------------------------------------------------------------------------------------------------------------------------------------------------------------------------------------------------------------------------------------------------------------------------------------------------------------------------------------------------------------------|
|                                                                                                         | <p>J01XD02, J01XD03, J01XE01, J01XE02, J01XX01, J01XX02, J01XX03, J01XX04, J01XX05, J01XX06, J01XX07, J01XX08, J01XX09, J01XX11, J01XX12, J02AA01, J02AA02, J02AB01, J02AB02, J02AC01, J02AC02, J02AC03, J02AC04, J02AC05, J02AX01, J02AX04, J02AX05, J02AX06, J04AA01, J04AA02, J04AA03, J04AB01, J04AB02, J04AB03, J04AB04, J04AB05, J04AB06, J04AB30, J04AC01, J04AC51, J04AD01, J04AD02, J04AD03, J04AK01, J04AK02, J04AK03, J04AK04, J04AK05, J04AK06, J04AK07, J04AM01, J04AM02, J04AM03, J04AM04, J04AM05, J04AM06, J04AM07, J04AM08, J04BA01, J04BA02, J04BA03, P01AA01, P01AA02, P01AA04, P01AA05, P01AA52, P01AB01, P01AB02, P01AB03, P01AB04, P01AB05, P01AB06, P01AB07, P01AC01, P01AC02, P01AC03, P01AC04, P01AR01, P01AR02, P01AR03, P01AR53, P01AX01, P01AX02, P01AX04, P01AX05, P01AX06, P01AX07, P01AX08, P01AX09, P01AX10, P01AX11, P01AX52, P01BA01, P01BA02, P01BA03, P01BA06, P01BA07, P01BB01, P01BB02, P01BB51, P01BC01, P01BC02, P01BD01, P01BD51, P01BE01, P01BE02, P01BE03, P01BE04, P01BE05, P01BE52, P01BF01, P01BF02, P01BF03, P01BF04, P01BF05, P01BF06, P01BX01, P01CA02, P01CA03, P01CB01, P01CB02, P01CC01, P01CC02, P01CD01, P01CD02, P01CX01, P01CX02, P01CX03, P01CX04, P02BA01, P02BA02, P02BB01, P02BX01, P02BX02, P02BX03, P02BX04, P02CA01, P02CA02, P02CA03, P02CA04, P02CA05, P02CA06, P02CA51, P02CB01, P02CB02, P02CC01, P02CC02, P02CE01, P02CF01, P02CX01, P02CX02, P02CX03, P02DA01, P02DX01, P02DX02, P03AA01, P03AA02, P03AA03, P03AA04, P03AA05, P03AA54, P03AB01, P03AB02, P03AB51, P03AC01, P03AC02, P03AC04, P03AC04, P03AC51, P03AC52, P03AC53, P03AC54, P03AX01, P03AX02, P03AX03, P03AX04, P03AX05, P03BA01, P03BA02, P03BA03, P03BA04, P03BX01, P03BX02, P03BX03, P03BX04, P03BX05, P03BX06</p> |
| <b>Insulin and other antidiabetics (MG3)</b>                                                            | <p>A10AB01, A10AB02, A10AB03, A10AB04, A10AB05, A10AB06, A10AB30, A10AC01, A10AC02, A10AC03, A10AC04, A10AC30, A10AD01, A10AD02, A10AD03, A10AD04, A10AD05, A10AD06, A10AD30, A10AE01, A10AE02, A10AE03, A10AE04, A10AE05, A10AE06, A10AE30, A10AE54, A10AE56, A10AF01, A10BA01, A10BA02, A10BA03, A10BB01, A10BB02, A10BB03, A10BB04, A10BB05, A10BB06, A10BB07, A10BB08, A10BB09, A10BB10, A10BB11, A10BB12, A10BB31, A10BC01, A10BD01, A10BD02, A10BD03, A10BD04, A10BD05, A10BD06, A10BD07, A10BD08, A10BD09, A10BD10, A10BD11, A10BD12, A10BD13, A10BD14, A10BD15, A10BD16, A10BD17, A10BD18, A10BD19, A10BD20, A10BD21, A10BD22, A10BD24, A10BD25, A10BD26, A10BF01, A10BF02, A10BF03, A10BG01, A10BG02, A10BG03, A10BG04, A10BH01, A10BH02, A10BH03, A10BH04, A10BH05, A10BH06, A10BH07, A10BH08, A10BH52, A10BJ01, A10BJ02, A10BJ03, A10BJ04, A10BJ05, A10BJ06, A10BK01, A10BK02, A10BK03, A10BK04, A10BK05, A10BK06, A10BK07, A10BX01, A10BX02, A10BX03, A10BX04, A10BX05, A10BX06, A10BX07, A10BX08, A10BX09, A10BX10, A10BX11, A10BX12, A10BX13, A10BX14, A10XA01</p>                                                                                                                                                                                                                                                                                                                                                                                                                                                                                                                                                                                                                                                                         |
| <b>Heart drugs (MG4)</b>                                                                                | <p>C01AA01, C01AA02, C01AA03, C01AA04, C01AA05, C01AA06, C01AA07, C01AA08, C01AA09, C01AA52, C01AB01, C01AB51, C01AC01, C01AC03, C01AX02, C01BA01, C01BA02, C01BA03, C01BA04, C01BA05, C01BA08, C01BA12, C01BA51, C01BA71, C01BB01, C01BB02, C01BB03, C01BB04, C01BC03, C01BC04, C01BC07, C01BC08, C01BD01, C01BD02, C01BD03, C01BD04, C01BD05, C01BD06, C01BD07, C01BG01, C01BG07, C01BG11, C01CA01, C01CA02, C01CA03, C01CA04, C01CA05, C01CA06, C01CA07, C01CA08, C01CA09, C01CA10, C01CA11, C01CA12, C01CA13, C01CA14, C01CA15, C01CA16, C01CA17, C01CA18, C01CA19, C01CA21, C01CA22, C01CA23, C01CA24, C01CA25, C01CA26, C01CA30, C01CA51, C01CE01, C01CE02, C01CE03, C01CE04, C01CX06, C01CX07, C01CX08, C01CX09, C01DA02, C01DA04, C01DA05, C01DA07, C01DA08, C01DA09, C01DA13, C01DA14, C01DA20, C01DA38, C01DA52, C01DA54, C01DA55, C01DA57, C01DA58, C01DA59, C01DA63, C01DA70, C01DB01, C01DX01, C01DX02, C01DX03, C01DX04, C01DX05, C01DX06, C01DX07, C01DX08, C01DX09, C01DX10, C01DX11, C01DX12, C01DX13, C01DX14, C01DX15, C01DX16, C01DX18, C01DX19, C01DX51, C01DX52, C01DX53, C01DX54, C01EA01, C01EB02, C01EB03, C01EB04, C01EB05, C01EB06, C01EB07, C01EB09, C01EB10, C01EB11, C01EB12, C01EB13, C01EB15, C01EB16, C01EB17, C01EB18, C01EB19, C01EB21</p>                                                                                                                                                                                                                                                                                                                                                                                                                                                                            |
| <b>Antihypertensives, including diuretics and renin-angiotensin-aldosterone system inhibitors (MG5)</b> | <p>C02AA01, C02AA02, C02AA03, C02AA04, C02AA05, C02AA06, C02AA07, C02AA52, C02AA53, C02AA57, C02AB01, C02AB02, C02AC01, C02AC02, C02AC04, C02AC05, C02AC06, C02BA01, C02BB01, C02CA01, C02CA02, C02CA03, C02CA04, C02CA06, C02CA08, C02CC01, C02CC02, C02CC03, C02CC04, C02CC05, C02CC06, C02CC07, C02DA01, C02DB01, C02DB02, C02DB03, C02DB04, C02DC01, C02DD01, C02DG01, C02KA01, C02KB01, C02KC01, C02KD01, C02KX01, C02KX02, C02KX03, C02KX04, C02KX05, C02KX52, C02LA01, C02LA02, C02LA03, C02LA04, C02LA07, C02LA08, C02LA09, C02LA50, C02LA51, C02LA52, C02LA71, C02LB01, C02LC01, C02LC05, C02LC51, C02LE01, C02LF01, C02LG01, C02LG02, C02LG03, C02LG51, C02LG73, C02LK01, C02LL01, C02LX01, C03AA01, C03AA02, C03AA03, C03AA04, C03AA05, C03AA06, C03AA07, C03AA08, C03AA09, C03AA13, C03AB01, C03AB02, C03AB03, C03AB04, C03AB05, C03AB06, C03AB07, C03AB08, C03AB09, C03AH01, C03AH02, C03AX01, C03BA02, C03BA03, C03BA04, C03BA05, C03BA07, C03BA08, C03BA09, C03BA10, C03BA11, C03BA12, C03BA13, C03BA82, C03BB02, C03BB03, C03BB04,</p>                                                                                                                                                                                                                                                                                                                                                                                                                                                                                                                                                                                                                                                                                                   |

|                                                                                                                   |                                                                                                                                                                                                                                                                                                                                                                                                                                                                                                                                                                                                                                                                                                                                                                                                                                                                                                                                                                                                                                                                                                                                                                                                                                                                                                                                                                                                                                                                                                                                                                                                                                                                                                                        |
|-------------------------------------------------------------------------------------------------------------------|------------------------------------------------------------------------------------------------------------------------------------------------------------------------------------------------------------------------------------------------------------------------------------------------------------------------------------------------------------------------------------------------------------------------------------------------------------------------------------------------------------------------------------------------------------------------------------------------------------------------------------------------------------------------------------------------------------------------------------------------------------------------------------------------------------------------------------------------------------------------------------------------------------------------------------------------------------------------------------------------------------------------------------------------------------------------------------------------------------------------------------------------------------------------------------------------------------------------------------------------------------------------------------------------------------------------------------------------------------------------------------------------------------------------------------------------------------------------------------------------------------------------------------------------------------------------------------------------------------------------------------------------------------------------------------------------------------------------|
|                                                                                                                   | C03BB05, C03BB07, C03BC01, C03BD01, C03BX03, C03CA01, C03CA02, C03CA03, C03CA04, C03CB01, C03CB02, C03CC01, C03CC02, C03CD01, C03CX01, C03DA01, C03DA02, C03DA03, C03DA04, C03DB01, C03DB02, C03EA01, C03EA02, C03EA03, C03EA04, C03EA05, C03EA06, C03EA07, C03EA12, C03EA13, C03EA14, C03EB01, C03EB02, C08CA01, C08CA02, C08CA03, C08CA04, C08CA05, C08CA06, C08CA07, C08CA08, C08CA09, C08CA10, C08CA11, C08CA12, C08CA13, C08CA14, C08CA15, C08CA16, C08CA51, C08CA55, C08CX01, C08DA01, C08DA02, C08DA51, C08DB01, C08EA01, C08EA02, C08EX01, C08EX02, C08GA01, C08GA02, C09AA01, C09AA02, C09AA03, C09AA04, C09AA05, C09AA06, C09AA07, C09AA08, C09AA09, C09AA10, C09AA11, C09AA12, C09AA13, C09AA14, C09AA15, C09AA16, C09BA01, C09BA02, C09BA03, C09BA04, C09BA05, C09BA06, C09BA07, C09BA08, C09BA09, C09BA12, C09BA13, C09BA15, C09BB02, C09BB03, C09BB04, C09BB05, C09BB06, C09BB07, C09BB10, C09BB12, C09BX01, C09BX03, C09BX04, C09BX05, C09CA01, C09CA02, C09CA03, C09CA04, C09CA05, C09CA06, C09CA07, C09CA08, C09CA09, C09DA01, C09DA02, C09DA03, C09DA04, C09DA06, C09DA07, C09DA08, C09DA10, C09DB01, C09DB02, C09DB04, C09DB05, C09DB06, C09DB07, C09DB09, C09DX01, C09DX02, C09DX03, C09DX04, C09DX05, C09DX06, C09DX07, C09XA01, C09XA02, C09XA52, C09XA53, C09XA54                                                                                                                                                                                                                                                                                                                                                                                                                               |
| <b>Beta-blockers (MG6)</b>                                                                                        | C07AA01, C07AA02, C07AA03, C07AA05, C07AA06, C07AA07, C07AA12, C07AA14, C07AA15, C07AA16, C07AA17, C07AA19, C07AA23, C07AA27, C07AA57, C07AB01, C07AB02, C07AB03, C07AB04, C07AB05, C07AB06, C07AB07, C07AB08, C07AB09, C07AB10, C07AB11, C07AB12, C07AB13, C07AB14, C07AB52, C07AG01, C07AG02, C07BA02, C07BA05, C07BA06, C07BA07, C07BA12, C07BA68, C07BB02, C07BB03, C07BB04, C07BB06, C07BB07, C07BB12, C07BB52, C07BG01, C07CA02, C07CA03, C07CA17, C07CA23, C07CB02, C07CB03, C07CB53, C07CG01, C07DA06, C07DB01, C07FA05, C07FB02, C07FB03, C07FB07, C07FB13, C07FX01, C07FX02, C07FX03, C07FX04, C07FX05, C07FX06                                                                                                                                                                                                                                                                                                                                                                                                                                                                                                                                                                                                                                                                                                                                                                                                                                                                                                                                                                                                                                                                                              |
| <b>Statins, fibrates, including proprotein convertase subtilisin/kexin type 9 inhibitors and inclisiran (MG7)</b> | C10AA01, C10AA02, C10AA03, C10AA04, C10AA05, C10AA06, C10AA07, C10AA08, C10AA51, C10AA52, C10AA53, C10AA55, C10AB01, C10AB02, C10AB03, C10AB04, C10AB05, C10AB06, C10AB07, C10AB08, C10AB09, C10AB10, C10AB11, C10AX06, C10AX07, C10AX08, C10AX09, C10AX10, C10AX11, C10AX12, C10AX13, C10AX14, C10AX15, C10AX16, C10BA01, C10BA02, C10BA03, C10BA04, C10BA05, C10BA06, C10BA07, C10BA08, C10BA09, C10BA10, C10BX01, C10BX02, C10BX03, C10BX04, C10BX05, C10BX06, C10BX07, C10BX08, C10BX09, C10BX10, C10BX11, C10BX12, C10BX13, C10BX14, C10BX15, C10BX16, C10BX17, C10BX18                                                                                                                                                                                                                                                                                                                                                                                                                                                                                                                                                                                                                                                                                                                                                                                                                                                                                                                                                                                                                                                                                                                                           |
| <b>Immunosuppressants and immunomodulators (MG8)</b>                                                              | D11AH05, L04AA01, L04AA02, L04AA03, L04AA04, L04AA05, L04AA06, L04AA08, L04AA09, L04AA10, L04AA11, L04AA12, L04AA13, L04AA14, L04AA15, L04AA16, L04AA17, L04AA18, L04AA19, L04AA21, L04AA22, L04AA23, L04AA24, L04AA25, L04AA26, L04AA27, L04AA28, L04AA29, L04AA31, L04AA32, L04AA33, L04AA34, L04AA36, L04AA37, L04AA38, L04AA39, L04AA40, L04AA41, L04AA42, L04AA43, L04AA44, L04AA45, L04AA46, L04AB01, L04AB02, L04AB03, L04AB04, L04AB05, L04AB06, L04AB07, L04AC01, L04AC02, L04AC03, L04AC04, L04AC05, L04AC06, L04AC07, L04AC08, L04AC09, L04AC10, L04AC11, L04AC12, L04AC13, L04AC14, L04AC15, L04AC16, L04AC17, L04AC18, L04AC19, L04AD01, L04AD02, L04AD03, L04AX01, L04AX02, L04AX03, L04AX04, L04AX05, L04AX06, L04AX07, L04AX08                                                                                                                                                                                                                                                                                                                                                                                                                                                                                                                                                                                                                                                                                                                                                                                                                                                                                                                                                                         |
| <b>Systemic steroids (MG9)</b>                                                                                    | H02AA01, H02AA02, H02AA03, H02AB01, H02AB02, H02AB03, H02AB04, H02AB05, H02AB06, H02AB07, H02AB08, H02AB09, H02AB10, H02AB11, H02AB12, H02AB13, H02AB14, H02AB15, H02AB17, H02BX01, H02CA01, H02CA02, H02CA03                                                                                                                                                                                                                                                                                                                                                                                                                                                                                                                                                                                                                                                                                                                                                                                                                                                                                                                                                                                                                                                                                                                                                                                                                                                                                                                                                                                                                                                                                                          |
| <b>Chemotherapy (MG10)</b>                                                                                        | L01AA01, L01AA02, L01AA03, L01AA05, L01AA06, L01AA07, L01AA08, L01AA09, L01AB01, L01AB02, L01AB03, L01AC01, L01AC02, L01AC03, L01AD01, L01AD02, L01AD03, L01AD04, L01AD05, L01AD06, L01AD07, L01AD08, L01AG01, L01AX01, L01AX02, L01AX03, L01AX04, L01BA01, L01BA03, L01BA04, L01BB02, L01BB03, L01BB04, L01BB05, L01BB06, L01BB07, L01BC01, L01BC02, L01BC03, L01BC04, L01BC05, L01BC06, L01BC07, L01BC08, L01BC09, L01BC52, L01BC53, L01BC59, L01CA01, L01CA02, L01CA03, L01CA04, L01CA05, L01CB01, L01CB02, L01CC01, L01CD01, L01CD02, L01CD03, L01CD04, L01CE01, L01CE02, L01CE03, L01CE04, L01CX01, L01DA01, L01DB01, L01DB02, L01DB03, L01DB04, L01DB05, L01DB06, L01DB07, L01DB08, L01DB09, L01DB10, L01DB11, L01DC01, L01DC02, L01DC03, L01DC04, L01EA01, L01EA02, L01EA03, L01EA04, L01EA05, L01EB01, L01EB02, L01EB03, L01EB04, L01EB05, L01EB07, L01EB08, L01EC01, L01EC02, L01EC03, L01ED01, L01ED02, L01ED03, L01ED04, L01ED05, L01EE01, L01EE02, L01EE03, L01EF01, L01EF02, L01EF03, L01EG01, L01EG02, L01EH01, L01EH02, L01EJ01, L01EJ02, L01EK01, L01EK03, L01EL01, L01EL02, L01EM01, L01EM02, L01EM03, L01EX01, L01EX02, L01EX03, L01EX04, L01EX05, L01EX07, L01EX08, L01EX09, L01EX10, L01EX11, L01EX12, L01EX13, L01EX14, L01XA01, L01XA02, L01XA03, L01XA04, L01XA05, L01XB01, L01XC01, L01XC02, L01XC03, L01XC04, L01XC05, L01XC06, L01XC07, L01XC08, L01XC09, L01XC10, L01XC11, L01XC12, L01XC13, L01XC14, L01XC15, L01XC16, L01XC17, L01XC18, L01XC19, L01XC21, L01XC22, L01XC23, L01XC24, L01XC25, L01XC26, L01XC27, L01XC28, L01XC29, L01XC31, L01XC32, L01XC33, L01XC34, L01XC35, L01XC36, L01XC37, L01XC38, L01XC39, L01XC40, L01XC41, L01XD01, L01XD02, L01XD03, L01XD04, L01XD05, L01XD06 |

|                                                                                            |                                                                                                                                                                                                                                                                                                                                                                                                                                                                                                                                                                                                                                                                                                                                                                                                                                                                                                                                                                                                                                                                                                                                                                                                                                                                                                                                                                                                                                                                                                |
|--------------------------------------------------------------------------------------------|------------------------------------------------------------------------------------------------------------------------------------------------------------------------------------------------------------------------------------------------------------------------------------------------------------------------------------------------------------------------------------------------------------------------------------------------------------------------------------------------------------------------------------------------------------------------------------------------------------------------------------------------------------------------------------------------------------------------------------------------------------------------------------------------------------------------------------------------------------------------------------------------------------------------------------------------------------------------------------------------------------------------------------------------------------------------------------------------------------------------------------------------------------------------------------------------------------------------------------------------------------------------------------------------------------------------------------------------------------------------------------------------------------------------------------------------------------------------------------------------|
|                                                                                            | L01XD07, L01XE01, L01XE02, L01XE03, L01XE04, L01XE05, L01XE06, L01XE07, L01XE08, L01XE09, L01XE10, L01XE11, L01XE12, L01XE13, L01XE14, L01XE15, L01XE16, L01XE17, L01XE18, L01XE21, L01XE23, L01XE24, L01XE25, L01XE26, L01XE27, L01XE28, L01XE29, L01XE31, L01XE33, L01XE34, L01XE35, L01XE36, L01XE37, L01XE38, L01XE39, L01XE41, L01XE42, L01XE43, L01XE44, L01XE45, L01XE46, L01XE47, L01XE48, L01XE50, L01XE51, L01XE52, L01XE53, L01XE54, L01XE56, L01XE57, L01XF01, L01XF02, L01XF03, L01XG01, L01XG02, L01XG03, L01XH01, L01XH02, L01XH03, L01XH05, L01XJ01, L01XJ02, L01XJ03, L01XK01, L01XK02, L01XK03, L01XK04, L01XX01, L01XX02, L01XX03, L01XX05, L01XX07, L01XX08, L01XX09, L01XX10, L01XX11, L01XX14, L01XX16, L01XX17, L01XX18, L01XX19, L01XX22, L01XX23, L01XX24, L01XX25, L01XX27, L01XX28, L01XX29, L01XX31, L01XX32, L01XX33, L01XX34, L01XX35, L01XX36, L01XX37, L01XX38, L01XX39, L01XX40, L01XX41, L01XX42, L01XX43, L01XX44, L01XX45, L01XX46, L01XX47, L01XX48, L01XX50, L01XX51, L01XX52, L01XX53, L01XX54, L01XX55, L01XX56, L01XX57, L01XX58, L01XX59, L01XX60, L01XX61, L01XX62, L01XX63, L01XX64, L01XX65, L01XX66, L01XX67, L01XX68, L01XX70, L01XX71, L01XY01, L01XY02, L02AA01, L02AA02, L02AA03, L02AA04, L02AB01, L02AB02, L02AB03, L02AE01, L02AE02, L02AE03, L02AE04, L02AE05, L02AE51, L02BA01, L02BA02, L02BA03, L02BB01, L02BB02, L02BB03, L02BB04, L02BB05, L02BB06, L02BG01, L02BG02, L02BG03, L02BG04, L02BG05, L02BG06, L02BX01, L02BX02, L02BX03 |
| <b>Iron supplements, erythropoietic stimulating agents, vitamin B12, folic acid (MG11)</b> | B03AA01, B03AA02, B03AA03, B03AA04, B03AA05, B03AA06, B03AA07, B03AA08, B03AA09, B03AA10, B03AA11, B03AA12, B03AB01, B03AB02, B03AB03, B03AB04, B03AB05, B03AB06, B03AB07, B03AB08, B03AB09, B03AB10, B03AC01, B03AC02, B03AC03, B03AC05, B03AC06, B03AC07, B03AD01, B03AD02, B03AD03, B03AD04, B03AD05, B03AE01, B03AE02, B03AE03, B03AE04, B03AE10, B03BA01, B03BA02, B03BA03, B03BA04, B03BA05, B03BA51, B03BA53, B03BB01, B03BB51, B03XA01, B03XA02, B03XA03, B03XA05, B03XA06                                                                                                                                                                                                                                                                                                                                                                                                                                                                                                                                                                                                                                                                                                                                                                                                                                                                                                                                                                                                             |
| <b>Antacids, including antihistamines (MG12)</b>                                           | A02BB01, A02BB02, A02BC01, A02BC02, A02BC03, A02BC04, A02BC05, A02BC06, A02BC08                                                                                                                                                                                                                                                                                                                                                                                                                                                                                                                                                                                                                                                                                                                                                                                                                                                                                                                                                                                                                                                                                                                                                                                                                                                                                                                                                                                                                |
| <b>Vitamin D and other vitamin supplements (MG13)</b>                                      | A11CA01, A11CA02, A11CC01, A11CC02, A11CC03, A11CC04, A11CC05, A11CC06, A11CC07, A11CC20, A11CC55, A11DA01, A11DA02, A11DA03, A11GA01, A11GB01, A11HA01, A11HA02, A11HA03, A11HA04, A11HA05, A11HA06, A11HA07, A11HA08, A11HA30, A11HA31, A11HA32                                                                                                                                                                                                                                                                                                                                                                                                                                                                                                                                                                                                                                                                                                                                                                                                                                                                                                                                                                                                                                                                                                                                                                                                                                              |
| <b>Caplacizumab (MG14)</b>                                                                 | B01AX07                                                                                                                                                                                                                                                                                                                                                                                                                                                                                                                                                                                                                                                                                                                                                                                                                                                                                                                                                                                                                                                                                                                                                                                                                                                                                                                                                                                                                                                                                        |
| <b>Systemic hemostatics (MG15)</b>                                                         | B02BX01, B02BX02, B02BX03, B02BX04, B02BX05, B02BX06, B02BX07, B02BX08, B02BX09                                                                                                                                                                                                                                                                                                                                                                                                                                                                                                                                                                                                                                                                                                                                                                                                                                                                                                                                                                                                                                                                                                                                                                                                                                                                                                                                                                                                                |
| <b>Hereditary angioedema therapeutics (MG16)</b>                                           | B06AC01, B06AC02, B06AC03, B06AC04, B06AC05                                                                                                                                                                                                                                                                                                                                                                                                                                                                                                                                                                                                                                                                                                                                                                                                                                                                                                                                                                                                                                                                                                                                                                                                                                                                                                                                                                                                                                                    |
| <b>Peripheral vasodilators (MG17)</b>                                                      | C04AA01, C04AA02, C04AA31, C04AB01, C04AB02, C04AC01, C04AC02, C04AC03, C04AC07, C04AD01, C04AD02, C04AD03, C04AD04, C04AE01, C04AE02, C04AE04, C04AE51, C04AE54, C04AF01, C04AX01, C04AX02, C04AX07, C04AX10, C04AX11, C04AX13, C04AX17, C04AX19, C04AX20, C04AX21, C04AX23, C04AX24, C04AX26, C04AX27, C04AX28, C04AX30, C04AX32                                                                                                                                                                                                                                                                                                                                                                                                                                                                                                                                                                                                                                                                                                                                                                                                                                                                                                                                                                                                                                                                                                                                                             |
| <b>Hormonal contraceptives and similar hormone preparations (MG18)</b>                     | G03AA01, G03AA02, G03AA03, G03AA04, G03AA05, G03AA06, G03AA07, G03AA08, G03AA09, G03AA10, G03AA11, G03AA12, G03AA13, G03AA14, G03AA15, G03AA16, G03AA17, G03AB01, G03AB02, G03AB03, G03AB04, G03AB05, G03AB06, G03AB07, G03AB08, G03AB09, G03AC01, G03AC02, G03AC03, G03AC04, G03AC05, G03AC06, G03AC07, G03AC08, G03AC09, G03AC10, G03AD01, G03AD02, G03BA01, G03BA02, G03BA03, G03BB01, G03BB02, G03CA01, G03CA03, G03CA04, G03CA06, G03CA07, G03CA09, G03CA53, G03CA57, G03CB01, G03CB02, G03CB03, G03CB04, G03CC02, G03CC03, G03CC04, G03CC05, G03CC06, G03CC07, G03CX01, G03DA01, G03DA02, G03DA03, G03DA04, G03DB01, G03DB02, G03DB03, G03DB04, G03DB05, G03DB06, G03DB07, G03DB08, G03DC01, G03DC02, G03DC03, G03DC04, G03DC05, G03DC06, G03DC31, G03EA01, G03EA02, G03EA03, G03EK01, G03FA01, G03FA02, G03FA03, G03FA04, G03FA05, G03FA06, G03FA07, G03FA08, G03FA09, G03FA10, G03FA11, G03FA12, G03FA13, G03FA14, G03FA15, G03FA16, G03FA17, G03FB01, G03FB02, G03FB03, G03FB04, G03FB05, G03FB06, G03FB07, G03FB08, G03FB09, G03FB10, G03FB11, G03GA01, G03GA02, G03GA03, G03GA04, G03GA05, G03GA06, G03GA07, G03GA08, G03GA09, G03GA10, G03GA30, G03GB01, G03GB02, G03GB03, G03HA01, G03HB01, G03XA01, G03XA02, G03XB01, G03XB02, G03XC01, G03XC02, G03XC03, G03XX01                                                                                                                                                                                                                |
| <b>Immunoglobulins (MG19)</b>                                                              | J06BA01, J06BA02                                                                                                                                                                                                                                                                                                                                                                                                                                                                                                                                                                                                                                                                                                                                                                                                                                                                                                                                                                                                                                                                                                                                                                                                                                                                                                                                                                                                                                                                               |
| <b>Interferons and CSF (MG20)</b>                                                          | L03AA02, L03AA03, L03AA09, L03AA10, L03AA12, L03AA13, L03AA14, L03AA16, L03AA17, L03AB01, L03AB02, L03AB03, L03AB04, L03AB05, L03AB06, L03AB07, L03AB08, L03AB09, L03AB10, L03AB11, L03AB12, L03AB13, L03AB15, L03AB60, L03AB61, L03AC01, L03AC02, L03AX01, L03AX02, L03AX03, L03AX04, L03AX05, L03AX07, L03AX08, L03AX09, L03AX10, L03AX11, L03AX12, L03AX13, L03AX14, L03AX15, L03AX16, L03AX17, L03AX21                                                                                                                                                                                                                                                                                                                                                                                                                                                                                                                                                                                                                                                                                                                                                                                                                                                                                                                                                                                                                                                                                     |

|                                                       |                                                                                                                                                                                                                                                                                                                                                                                                                                                                                                                                                                                                                                                                                                                                                                                                                                                                                                                                                                                                                                                                                                                                                                                                                                                                                                                                                                                                                                                                                                                                                                                                                                                                                                                                                                                                                                                                                                                                                                                                                                                                                                                                                                                                                                                                                                                                                                                                                                                                                                                                                                                                                        |
|-------------------------------------------------------|------------------------------------------------------------------------------------------------------------------------------------------------------------------------------------------------------------------------------------------------------------------------------------------------------------------------------------------------------------------------------------------------------------------------------------------------------------------------------------------------------------------------------------------------------------------------------------------------------------------------------------------------------------------------------------------------------------------------------------------------------------------------------------------------------------------------------------------------------------------------------------------------------------------------------------------------------------------------------------------------------------------------------------------------------------------------------------------------------------------------------------------------------------------------------------------------------------------------------------------------------------------------------------------------------------------------------------------------------------------------------------------------------------------------------------------------------------------------------------------------------------------------------------------------------------------------------------------------------------------------------------------------------------------------------------------------------------------------------------------------------------------------------------------------------------------------------------------------------------------------------------------------------------------------------------------------------------------------------------------------------------------------------------------------------------------------------------------------------------------------------------------------------------------------------------------------------------------------------------------------------------------------------------------------------------------------------------------------------------------------------------------------------------------------------------------------------------------------------------------------------------------------------------------------------------------------------------------------------------------------|
| <b>NSAID and other anti-inflammatory drugs (MG21)</b> | M01AA01, M01AA02, M01AA03, M01AA05, M01AA06, M01AB01, M01AB02, M01AB03, M01AB04, M01AB05, M01AB06, M01AB07, M01AB08, M01AB09, M01AB10, M01AB11, M01AB12, M01AB13, M01AB14, M01AB15, M01AB16, M01AB17, M01AB51, M01AB55, M01AC01, M01AC02, M01AC04, M01AC05, M01AC06, M01AC56, M01AE01, M01AE02, M01AE03, M01AE04, M01AE05, M01AE06, M01AE07, M01AE08, M01AE09, M01AE10, M01AE11, M01AE12, M01AE13, M01AE14, M01AE15, M01AE16, M01AE17, M01AE18, M01AE51, M01AE52, M01AE53, M01AE56, M01AG01, M01AG02, M01AG03, M01AG04, M01AH01, M01AH02, M01AH03, M01AH04, M01AH05, M01AH06, M01AH07, M01AX01, M01AX02, M01AX04, M01AX05, M01AX07, M01AX12, M01AX13, M01AX14, M01AX17, M01AX18, M01AX21, M01AX22, M01AX23, M01AX24, M01AX25, M01AX26, M01AX68, M01BA01, M01BA02, M01BA03, M01CA03, M01CB01, M01CB02, M01CB03, M01CB04, M01CB05, M01CC01, M01CC02                                                                                                                                                                                                                                                                                                                                                                                                                                                                                                                                                                                                                                                                                                                                                                                                                                                                                                                                                                                                                                                                                                                                                                                                                                                                                                                                                                                                                                                                                                                                                                                                                                                                                                                                                                      |
| <b>Gout medications (MG22)</b>                        | M04AA01, M04AA02, M04AA03, M04AA51, M04AB01, M04AB02, M04AB03, M04AB04, M04AB05, M04AC01, M04AC02, M04AX01                                                                                                                                                                                                                                                                                                                                                                                                                                                                                                                                                                                                                                                                                                                                                                                                                                                                                                                                                                                                                                                                                                                                                                                                                                                                                                                                                                                                                                                                                                                                                                                                                                                                                                                                                                                                                                                                                                                                                                                                                                                                                                                                                                                                                                                                                                                                                                                                                                                                                                             |
| <b>Antiepileptics (MG23)</b>                          | N03AA01, N03AA02, N03AA03, N03AA04, N03AA30, N03AB01, N03AB02, N03AB03, N03AB04, N03AB05, N03AB52, N03AB54, N03AC01, N03AC02, N03AC03, N03AD01, N03AD02, N03AD03, N03AD51, N03AE01, N03AF01, N03AF02, N03AF03, N03AF04, N03AG01, N03AG02, N03AG03, N03AG04, N03AG05, N03AG06, N03AX03, N03AX07, N03AX09, N03AX10, N03AX11, N03AX12, N03AX13, N03AX14, N03AX15, N03AX16, N03AX17, N03AX18, N03AX21, N03AX22, N03AX23, N03AX24, N03AX30                                                                                                                                                                                                                                                                                                                                                                                                                                                                                                                                                                                                                                                                                                                                                                                                                                                                                                                                                                                                                                                                                                                                                                                                                                                                                                                                                                                                                                                                                                                                                                                                                                                                                                                                                                                                                                                                                                                                                                                                                                                                                                                                                                                  |
| <b>Antipsychotics (MG24)</b>                          | N05AA01, N05AA02, N05AA03, N05AA04, N05AA05, N05AA06, N05AB01, N05AB02, N05AB03, N05AB04, N05AB05, N05AB06, N05AB07, N05AB08, N05AB09, N05AB10, N05AC01, N05AC02, N05AC03, N05AC04, N05AD01, N05AD02, N05AD03, N05AD04, N05AD05, N05AD06, N05AD07, N05AD08, N05AD09, N05AE01, N05AE02, N05AE03, N05AE04, N05AF01, N05AF02, N05AF03, N05AF04, N05AF05, N05AG01, N05AG02, N05AG03, N05AH01, N05AH02, N05AH03, N05AH04, N05AH05, N05AH06, N05AK01, N05AL01, N05AL02, N05AL03, N05AL04, N05AL05, N05AL06, N05AL07, N05AN01, N05AX07, N05AX08, N05AX09, N05AX10, N05AX11, N05AX12, N05AX13, N05AX14, N05AX15, N05BA01, N05BA02, N05BA03, N05BA04, N05BA05, N05BA06, N05BA07, N05BA08, N05BA09, N05BA10, N05BA11, N05BA12, N05BA13, N05BA14, N05BA15, N05BA16, N05BA17, N05BA18, N05BA19, N05BA21, N05BA22, N05BA23, N05BA56, N05BB01, N05BB02, N05BB51, N05BC01, N05BC03, N05BC51, N05BC52, N05BD01, N05BE01, N05BX01, N05BX02, N05BX03, N05BX05, N05CA01, N05CA02, N05CA03, N05CA04, N05CA05, N05CA06, N05CA07, N05CA08, N05CA09, N05CA10, N05CA11, N05CA12, N05CA15, N05CA16, N05CA19, N05CA20, N05CA21, N05CA22, N05CB01, N05CB02, N05CC01, N05CC02, N05CC03, N05CC04, N05CC05, N05CD01, N05CD02, N05CD03, N05CD04, N05CD05, N05CD06, N05CD07, N05CD08, N05CD09, N05CD10, N05CD11, N05CD12, N05CD13, N05CD14, N05CE01, N05CE02, N05CE03, N05CF01, N05CF02, N05CF03, N05CF04, N05CH01, N05CH02, N05CM01, N05CM02, N05CM03, N05CM04, N05CM05, N05CM06, N05CM07, N05CM08, N05CM09, N05CM10, N05CM11, N05CM12, N05CM13, N05CM15, N05CM16, N05CM17, N05CM18, N05CM19, N05CX01, N05CX02, N05CX03, N05CX04, N05CX05, N05CX06, N06AA01, N06AA02, N06AA03, N06AA04, N06AA05, N06AA06, N06AA07, N06AA08, N06AA09, N06AA10, N06AA11, N06AA12, N06AA13, N06AA14, N06AA15, N06AA16, N06AA17, N06AA18, N06AA19, N06AA21, N06AA23, N06AB02, N06AB03, N06AB04, N06AB05, N06AB06, N06AB07, N06AB08, N06AB09, N06AB10, N06AF01, N06AF02, N06AF03, N06AF04, N06AF05, N06AF06, N06AG02, N06AG03, N06AX01, N06AX02, N06AX03, N06AX04, N06AX05, N06AX06, N06AX07, N06AX08, N06AX09, N06AX10, N06AX11, N06AX12, N06AX13, N06AX14, N06AX15, N06AX16, N06AX17, N06AX18, N06AX19, N06AX21, N06AX22, N06AX23, N06AX24, N06AX25, N06AX26, N06AX27, N06BA01, N06BA02, N06BA03, N06BA04, N06BA05, N06BA06, N06BA07, N06BA08, N06BA09, N06BA10, N06BA11, N06BA12, N06BA14, N06BC01, N06BC02, N06BX01, N06BX02, N06BX03, N06BX04, N06BX05, N06BX06, N06BX07, N06BX08, N06BX09, N06BX10, N06BX11, N06BX12, N06BX13, N06BX14, N06BX15, N06BX16, N06BX17, N06BX18, N06BX21, N06CA01, N06CA02, N06DA01, N06DA02, N06DA03, N06DA04, N06DA52, N06DX01, N06DX02 |
| <b>Rhinological and throat antiseptics (MG25)</b>     | R01AA02, R01AA03, R01AA04, R01AA05, R01AA06, R01AA07, R01AA08, R01AA09, R01AA10, R01AA11, R01AA12, R01AA13, R01AA14, R01AB01, R01AB02, R01AB03, R01AB05, R01AB06, R01AB07, R01AB08, R01AC01, R01AC02, R01AC03, R01AC04, R01AC05, R01AC06, R01AC07, R01AC08, R01AC51, R01AD01, R01AD02, R01AD03, R01AD04, R01AD05, R01AD06, R01AD07, R01AD08, R01AD09, R01AD11, R01AD12, R01AD13, R01AD52, R01AD53, R01AD57, R01AD58, R01AD60, R01AX01, R01AX02, R01AX03, R01AX05, R01AX06, R01AX07, R01AX08, R01AX09, R01AX10, R01AX30, R01BA01, R01BA02, R01BA03, R01BA51, R01BA52, R01BA53, R02AA01, R02AA02, R02AA03, R02AA05, R02AA06, R02AA09, R02AA10, R02AA11, R02AA12, R02AA13, R02AA14, R02AA15, R02AA16, R02AA17, R02AA18, R02AA19, R02AA20, R02AB01, R02AB02, R02AB03, R02AB04, R02AB30, R02AD01, R02AD02, R02AD03, R02AD04, R02AX01, R02AX03                                                                                                                                                                                                                                                                                                                                                                                                                                                                                                                                                                                                                                                                                                                                                                                                                                                                                                                                                                                                                                                                                                                                                                                                                                                                                                                                                                                                                                                                                                                                                                                                                                                                                                                                                                               |
| <b>Inhaled anti-obstructive drugs (MG26)</b>          | R03AA01, R03AB02, R03AB03, R03AC02, R03AC03, R03AC04, R03AC05, R03AC06, R03AC07, R03AC08, R03AC09, R03AC10, R03AC11, R03AC12, R03AC13, R03AC14,                                                                                                                                                                                                                                                                                                                                                                                                                                                                                                                                                                                                                                                                                                                                                                                                                                                                                                                                                                                                                                                                                                                                                                                                                                                                                                                                                                                                                                                                                                                                                                                                                                                                                                                                                                                                                                                                                                                                                                                                                                                                                                                                                                                                                                                                                                                                                                                                                                                                        |

|                                           |                                                                                                                                                                                                                                                                                                                                                                                                                                                                                                                                                                                                                                                                                                                                                                                                      |
|-------------------------------------------|------------------------------------------------------------------------------------------------------------------------------------------------------------------------------------------------------------------------------------------------------------------------------------------------------------------------------------------------------------------------------------------------------------------------------------------------------------------------------------------------------------------------------------------------------------------------------------------------------------------------------------------------------------------------------------------------------------------------------------------------------------------------------------------------------|
|                                           | R03AC15, R03AC16, R03AC17, R03AC18, R03AC19, R03AK01, R03AK02, R03AK03, R03AK04, R03AK05, R03AK06, R03AK07, R03AK08, R03AK09, R03AK10, R03AK11, R03AK13, R03AK14, R03AL01, R03AL02, R03AL03, R03AL04, R03AL05, R03AL06, R03AL07, R03AL08, R03AL09, R03AL10, R03AL11, R03AL12, R03BB01, R03BB02, R03BB03, R03BB04, R03BB05, R03BB06, R03BB07, R03BB08, R03BC01, R03BC03, R03BX01, R03CA02, R03CB01, R03CB02, R03CB03, R03CB51, R03CB53, R03CC02, R03CC03, R03CC04, R03CC05, R03CC06, R03CC07, R03CC08, R03CC09, R03CC10, R03CC11, R03CC12, R03CC13, R03CC14, R03CC53, R03CC63, R03DA01, R03DA02, R03DA03, R03DA04, R03DA05, R03DA06, R03DA07, R03DA08, R03DA09, R03DA10, R03DA11, R03DA12, R03DA20, R03DA51, R03DA54, R03DA55, R03DA57, R03DA74, R03DB01, R03DB02, R03DB03, R03DB04, R03DB05, R03DB06 |
| <b>Inhaled steroids (MG27)</b>            | R03BA01, R03BA02, R03BA03, R03BA04, R03BA05, R03BA06, R03BA07, R03BA08, R03BA09                                                                                                                                                                                                                                                                                                                                                                                                                                                                                                                                                                                                                                                                                                                      |
| <b>Other COPD drugs (MG28)</b>            | R03DC01, R03DC02, R03DC03, R03DC04, R03DX01, R03DX02, R03DX03, R03DX05, R03DX06, R03DX07, R03DX08, R03DX09, R03DX10                                                                                                                                                                                                                                                                                                                                                                                                                                                                                                                                                                                                                                                                                  |
| <b>Cold and cough preparations (MG29)</b> | R05CA01, R05CA02, R05CA03, R05CA04, R05CA05, R05CA06, R05CA07, R05CA08, R05CA09, R05CA10, R05CA11, R05CA12, R05CA13, R05CB01, R05CB02, R05CB03, R05CB04, R05CB05, R05CB06, R05CB07, R05CB08, R05CB09, R05CB10, R05CB11, R05CB12, R05CB13, R05CB14, R05CB15, R05CB16, R05DA01, R05DA03, R05DA04, R05DA05, R05DA06, R05DA07, R05DA08, R05DA09, R05DA10, R05DA11, R05DA12, R05DA20, R05DB01, R05DB02, R05DB03, R05DB04, R05DB05, R05DB07, R05DB09, R05DB10, R05DB11, R05DB12, R05DB13, R05DB14, R05DB15, R05DB16, R05DB17, R05DB18, R05DB19, R05DB20, R05DB21, R05DB22, R05DB23, R05DB24, R05DB25, R05DB26, R05DB27, R05DB28, R05FA01, R05FA02, R05FB01, R05FB02                                                                                                                                        |
| <b>Systemic antihistamines (MG30)</b>     | R06AA01, R06AA02, R06AA04, R06AA06, R06AA07, R06AA08, R06AA09, R06AA52, R06AA54, R06AA56, R06AA57, R06AA59, R06AB01, R06AB02, R06AB03, R06AB04, R06AB05, R06AB06, R06AB07, R06AB51, R06AB52, R06AB54, R06AB56, R06AC01, R06AC02, R06AC03, R06AC04, R06AC05, R06AC06, R06AC52, R06AC53, R06AD01, R06AD02, R06AD03, R06AD04, R06AD05, R06AD06, R06AD07, R06AD08, R06AD09, R06AD52, R06AD55, R06AE01, R06AE03, R06AE04, R06AE05, R06AE06, R06AE07, R06AE09, R06AE51, R06AE53, R06AE55, R06AX01, R06AX02, R06AX03, R06AX04, R06AX05, R06AX07, R06AX08, R06AX09, R06AX11, R06AX12, R06AX13, R06AX15, R06AX16, R06AX17, R06AX18, R06AX19, R06AX21, R06AX22, R06AX23, R06AX24, R06AX25, R06AX26, R06AX27, R06AX28, R06AX29, R06AX53, R06AX58                                                                |



## Comparison of medication groups to control population

Tables S3 and S4 show the numbers and percentages of patients receiving at least one medication of the corresponding medication group in the year before index hospitalization, separately for COVID-hospitalized patients (S3), Influenza-hospitalized patients (S4) with their respectively age-, sex- and region- matched controls.

**Table S3: Medication Groups for COVID-19 hospitalized children as compared to controls**

| Medication Groups                                                                                     | COVID (n = 1063) |             | Control (n = 10626) |              | p-value |
|-------------------------------------------------------------------------------------------------------|------------------|-------------|---------------------|--------------|---------|
|                                                                                                       | No: n (%)        | Yes: n(%)   | No: n (%)           | Yes: n (%)   |         |
| MG 1: Anticoagulants                                                                                  | 1044 (98.21)     | 19 (1.79)   | 10559 (99.37)       | 67 (0.63)    | <0.001  |
| MG 2: Antibiotics, Antivirals, Antiprotozoals or Anthelmintics                                        | 832 (78.27)      | 231 (21.73) | 8941 (84.14)        | 1685 (15.86) | <0.001  |
| MG 3: Insulins and other Antidiabetics                                                                | 1060 (99.72)     | 3 (0.28)    | 10619 (99.93)       | 7 (0.07)     | 0.0554  |
| MG 4: "heart" drugs                                                                                   | 1059 (99.62)     | 4 (0.38)    | 10585 (99.61)       | 41 (0.39)    | 1       |
| MG 5: Antihypertensives incl. Diuretics and Renin-angiotensin-aldosterone system inhibitors           | 1058 (99.53)     | 5 (0.47)    | 10619 (99.93)       | 7 (0.07)     | 0.0028  |
| MG 6: Beta Blockers                                                                                   | 1060 (99.72)     | 3 (0.28)    | 10619 (99.93)       | 7 (0.07)     | 0.0554  |
| MG 7: Statins, Fibrates incl. Proprotein convertase subtilisin/kexin type 9 inhibitors and Inclisiran | 1062 (99.91)     | 1 (0.09)    | 10626 (100)         | 0 (0.0)      | 0.0909  |
| MG 8: Immunosuppressants and Immunomodulators                                                         | 1053 (99.06)     | 10 (0.94)   | 10615 (99.9)        | 11 (0.1)     | <0.001  |
| MG 9: Systemic Steroids                                                                               | 1041 (97.93)     | 22 (2.07)   | 10573 (99.5)        | 53 (0.5)     | <0.001  |
| MG 10: Chemotherapy                                                                                   | 1053 (99.06)     | 10 (0.94)   | 10622 (99.96)       | 4 (0.04)     | <0.001  |
| MG 11: Iron supplements, Erythropoietic stimulating agents, Vitamin B12, folic acid                   | 1050 (98.78)     | 13 (1.22)   | 10591 (99.67)       | 35 (0.33)    | <0.001  |
| MG 12: Antacids incl. Antihistamines                                                                  | 1036 (97.46)     | 27 (2.54)   | 10587 (99.63)       | 39 (0.37)    | <0.001  |
| MG 13: Vitamin D and other Vitamin supplements                                                        | 1019 (95.86)     | 44 (4.14)   | 10488 (98.7)        | 138 (1.3)    | <0.001  |
| MG 14: Caplacizumab                                                                                   | 1063 (100)       | 0 (0.0)     | 10626 (100)         | 0 (0.0)      | 1       |
| MG 15: Systemic Hemostatics                                                                           | 1063 (100)       | 0 (0.0)     | 10626 (100)         | 0 (0.0)      | 1       |
| MG 16: Hereditary angioedema Therapeutics                                                             | 1063 (100)       | 0 (0.0)     | 10626 (100)         | 0 (0.0)      | 1       |
| MG 17: Peripheral Vasodilators                                                                        | 1063 (100)       | 0 (0.0)     | 10626 (100)         | 0 (0.0)      | 1       |
| MG 18: Hormonal contraceptives and similar hormone preparations                                       | 1054 (99.15)     | 9 (0.85)    | 10557 (99.35)       | 69 (0.65)    | 0.4278  |
| MG 19: Immunoglobulins                                                                                | 1058 (99.53)     | 5 (0.47)    | 10626 (100)         | 0 (0.0)      | <0.001  |
| MG 20: Interferons and CSF                                                                            | 1056 (99.34)     | 7 (0.66)    | 10588 (99.64)       | 38 (0.36)    | 0.185   |
| MG 21: NSAR and other anti-inflammatory drugs                                                         | 992 (93.32)      | 71 (6.6)    | 10358 (97.48)       | 268 (2.52)   | <0.001  |
| MG 22: Gout medications                                                                               | 1063 (100)       | 0 (0.0)     | 10624 (99.98)       | 2 (0.02)     | 1       |
| MG 23: Antiepileptics                                                                                 | 1037 (97.55)     | 26 (2.45)   | 10591 (99.67)       | 35 (0.33)    | <0.001  |
| MG 24: Antipsychotics                                                                                 | 1017 (95.67)     | 46 (4.33)   | 10505 (98.86)       | 121 (1.14)   | <0.001  |
| MG 25: Rhinological and throat antiseptics                                                            | 999 (93.98)      | 64 (6.02)   | 10249 (96.45)       | 377 (3.55)   | <0.001  |
| MG 26: inhaled anti-obstructive drugs                                                                 | 1017 (95.67)     | 46 (4.33)   | 10462 (98.46)       | 164 (1.54)   | <0.001  |
| MG 27: inhaled steroids                                                                               | 1030 (96.9)      | 33 (3.1)    | 10456 (98.4)        | 170 (1.6)    | 0.0012  |
| MG 28: other COPD drugs                                                                               | 1053 (99.06)     | 10 (0.94)   | 10588 (99.64)       | 38 (0.36)    | 0.0099  |
| MG 29: Cold and Cough preparations                                                                    | 1031 (96.99)     | 32 (3.01)   | 10480 (98.63)       | 146 (1.37)   | <0.001  |
| MG 30: Systemic Antihistamines                                                                        | 1033 (97.18)     | 30 (2.82)   | 10393 (97.81)       | 233 (2.19)   | 0.1922  |

**Table S4: Medication Groups for Influenza-hospitalized children as compared to controls**

| Medication Groups                                                                                            | Influenza (n = 2781) |              | Control (n = 27634) |              | p-value |
|--------------------------------------------------------------------------------------------------------------|----------------------|--------------|---------------------|--------------|---------|
|                                                                                                              | No: n (%)            | Yes: n(%)    | No: n (%)           | Yes: n (%)   |         |
| <b>MG 1: Anticoagulants</b>                                                                                  | 2765 (99.42)         | 16 (0.58)    | 27578 (99.8)        | 56 (0.2)     | <0.001  |
| <b>MG 2: Antibiotics, Antivirals, Antiprotozoals or Anthelmintics</b>                                        | 1632 (58.68)         | 1149 (41.32) | 19902 (72.02)       | 7732 (27.98) | <0.001  |
| <b>MG 3: Insulins and other Antidiabetics</b>                                                                | 2772 (99.68)         | 9 (0.32)     | 27618 (99.94)       | 16 (0.06)    | <0.001  |
| <b>MG 4: "heart" drugs</b>                                                                                   | 2773 (99.71)         | 8 (0.29)     | 27584 (99.82)       | 50 (0.18)    | 0.2474  |
| <b>MG 5: Antihypertensives incl. Diuretics and Renin-angiotensin-aldosterone system inhibitors</b>           | 2770 (99.6)          | 11 (0.4)     | 27626 (99.97)       | 8 (0.03)     | <0.001  |
| <b>MG 6: Beta Blockers</b>                                                                                   | 2779 (99.93)         | 2 (0.07)     | 27627 (99.97)       | 7 (0.03)     | 0.196   |
| <b>MG 7: Statins, Fibrates incl. Proprotein convertase subtilisin/kexin type 9 inhibitors and Inclisiran</b> | 2780 (99.96)         | 1 (0.04)     | 27630 (99.99)       | 4 (0.01)     | 0.3809  |
| <b>MG 8: Immunosuppressants and Immunomodulators</b>                                                         | 2769 (99.57)         | 12 (0.43)    | 27620 (99.95)       | 14 (0.05)    | <0.001  |
| <b>MG 9: Systemic Steroids</b>                                                                               | 2734 (98.31)         | 47 (1.69)    | 27495 (99.5)        | 139 (0.5)    | <0.001  |
| <b>MG 10: Chemotherapy</b>                                                                                   | 2774 (99.75)         | 7 (0.25)     | 27630 (99.99)       | 4 (0.01)     | <0.001  |
| <b>MG 11: Iron supplements, Erythropoietic stimulating agents, Vitamin B12, folic acid</b>                   | 2758 (99.17)         | 23 (0.83)    | 27533 (99.63)       | 101 (0.37)   | <0.001  |
| <b>MG 12: Antacids incl. Antihistamines</b>                                                                  | 2744 (98.67)         | 37 (1.33)    | 27563 (99.74)       | 71 (0.26)    | <0.001  |
| <b>MG 13: Vitamin D and other Vitamin supplements</b>                                                        | 2700 (97.09)         | 81 (2.91)    | 27188 (98.39)       | 446 (1.61)   | <0.001  |
| <b>MG 14: Caplacizumab</b>                                                                                   | 2781 (100)           | 0 (0.0)      | 27634 (100)         | 0 (0.0)      | 1       |
| <b>MG 15: Systemic Hemostatics</b>                                                                           | 2781 (100)           | 0 (0.0)      | 27634 (100)         | 0 (0.0)      | 1       |
| <b>MG 16: Hereditary angioedema Therapeutics</b>                                                             | 2781 (100)           | 0 (0.0)      | 27634 (100)         | 0 (0.0)      | 1       |
| <b>MG 17: Peripheral Vasodilators</b>                                                                        | 2780 (99.96)         | 1 (0.04)     | 27633 (100)         | 1 (0)        | 0.1745  |
| <b>MG 18: Hormonal contraceptives and similar hormone preparations</b>                                       | 2754 (99.03)         | 27 (0.97)    | 27388 (99.11)       | 246 (0.89)   | 0.6725  |
| <b>MG 19: Immunoglobulins</b>                                                                                | 2778 (99.89)         | 3 (0.11)     | 27634 (100)         | 0 (0.0)      | <0.001  |
| <b>MG 20: Interferons and CSF</b>                                                                            | 2748 (98.81)         | 33 (1.19)    | 27388 (99.11)       | 246 (0.89)   | 0.1177  |
| <b>MG 21: NSAR and other anti-inflammatory drugs</b>                                                         | 2599 (93.46)         | 182 (6.54)   | 26452 (95.72)       | 1182 (4.28)  | <0.001  |
| <b>MG 22: Gout medications</b>                                                                               | 2779 (99.93)         | 2 (0.07)     | 27633 (100)         | 1 (0.0)      | 0.0235  |
| <b>MG 23: Antiepileptics</b>                                                                                 | 2711 (97.48)         | 70 (2.52)    | 27583 (99.82)       | 51 (0.18)    | <0.001  |
| <b>MG 24: Antipsychotics</b>                                                                                 | 2677 (96.26)         | 104 (3.74)   | 27387 (99.11)       | 247 (0.89)   | <0.001  |
| <b>MG 25: Rhinological and throat antiseptics</b>                                                            | 2568 (92.34)         | 213 (7.66)   | 26269 (95.06)       | 1365 (4.94)  | <0.001  |
| <b>MG 26: inhaled anti-obstructive drugs</b>                                                                 | 2589 (93.1)          | 192 (6.9)    | 26892 (97.31)       | 742 (2.69)   | <0.001  |
| <b>MG 27: inhaled steroids</b>                                                                               | 2588 (93.06)         | 193 (6.94)   | 26544 (96.06)       | 1090 (3.94)  | <0.001  |
| <b>MG 28: other COPD drugs</b>                                                                               | 2719 (97.77)         | 62 (2.23)    | 27195 (98.41)       | 439 (1.59)   | 0.0151  |
| <b>MG 29: Cold and Cough preparations</b>                                                                    | 2657 (95.54)         | 124 (4.46)   | 26883 (97.28)       | 751 (2.72)   | <0.001  |
| <b>MG 30: Systemic Antihistamines</b>                                                                        | 2652 (95.36)         | 129 (4.64)   | 26703 (96.63)       | 931 (3.37)   | <0.001  |

## Outcome: Time to hospital discharge

Tables S5 and S6 show the results of the simple and multivariable Cox-Regression models to evaluate associations between medication groups and hospital discharge, separately for COVID-hospitalized children (S5) and Influenza-hospitalized children (S6). Note that all confounder with a  $p < 0.1$  in the simple models were further investigated in the multivariable model.

**Table S5: Results of simple and multivariable Cox models for hospital discharge after COVID-19 hospitalisation**

| Confounder                                                                                           | Simple           |         | Multivariable    |         |
|------------------------------------------------------------------------------------------------------|------------------|---------|------------------|---------|
|                                                                                                      | HR (CI)          | p-value | HR (CI)          | p-value |
| Age Group: 6-10 (ref: 0-5)                                                                           | 0.85 (0.80-0.91) | <0.001  | 0.84 (0.78-0.91) | <0.001  |
| Age Group: 11-15 (ref: 0-5)                                                                          | 0.96 (0.89-1.04) | 0.3016  | 0.96 (0.91-1.01) | 0.0963  |
| Age Group: 16-18 (ref: 0-5)                                                                          | 0.91 (0.76-1.09) | 0.3028  | 0.90 (0.75-1.09) | 0.2782  |
| Sex: W (ref: M)                                                                                      | 1.12 (0.99-1.26) | 0.0759  | 1.12 (0.97-1.29) | 0.1323  |
| Number Medication groups: 1 (ref: 0)                                                                 | 1.00 (0.94-1.07) | 0.9775  | 1.01 (0.87-1.17) | 0.9035  |
| Number Medication groups: >=2 (ref: 0)                                                               | 0.76 (0.63-0.91) | 0.0026  | 0.95 (0.74-1.23) | 0.7160  |
| Wave                                                                                                 | 1.10 (1.02-1.19) | 0.0111  | 1.12 (1.05-1.21) | 0.0011  |
| Wave                                                                                                 | 1.08 (0.95-1.23) | 0.2255  | 1.11 (0.97-1.28) | 0.1230  |
| Anticoagulants: Yes (ref: No)                                                                        | 0.67 (0.35-1.28) | 0.2257  |                  |         |
| Antibiotics, Antivirals, Antiprotozoals or Anthelmintics: Yes (ref: No)                              | 1.18 (0.97-1.42) | 0.0910  | 1.04 (0.84-1.30) | 0.6975  |
| Insulins and other Antidiabetics: Yes (ref: No)                                                      | 0.41 (0.11-1.61) | 0.2027  |                  |         |
| "heart" drugs: Yes (ref: No)                                                                         | 0.37 (0.13-1.00) | 0.0511  | 0.79 (0.25-2.46) | 0.6819  |
| Antihypertensives incl. Diuretics and Renin-angiotensin-aldosterone system inhibitors: Yes (ref: No) | 0.29 (0.10-0.84) | 0.0225  | 0.58 (0.18-1.91) | 0.3711  |
| Immunosuppressants and Immunomodulators: Yes (ref: No)                                               | 0.86 (0.55-1.34) | 0.4973  |                  |         |
| Systemic Steroids: Yes (ref: No)                                                                     | 0.88 (0.69-1.12) | 0.2850  |                  |         |
| Chemotherapy: Yes (ref: No)                                                                          | 0.69 (0.44-1.06) | 0.0880  | 0.85 (0.46-1.58) | 0.6044  |
| Iron supplements, Erythropoietic stimulating agents, Vitamin B12, folic acid: Yes (ref: No)          | 0.40 (0.23-0.69) | <0.001  | 0.43 (0.25-0.73) | 0.0019  |
| Antacids incl. Antihistamines: Yes (ref: No)                                                         | 0.61 (0.46-0.80) | <0.001  | 0.89 (0.70-1.13) | 0.3273  |
| Vitamin D and other Vitamin supplements: Yes (ref: No)                                               | 0.67 (0.59-0.75) | <0.001  | 0.82 (0.74-0.92) | <0.001  |
| Hormonal contraceptives and similar hormone preparations: Yes (ref: No)                              | 1.07 (0.65-1.77) | 0.7796  |                  |         |
| Interferons and CSF: Yes (ref: No)                                                                   | 0.62 (0.45-0.85) | 0.0030  | 0.69 (0.56-0.85) | <0.001  |
| NSAR and other anti-inflammatory drugs: Yes (ref: No)                                                | 1.00 (0.74-1.35) | 0.9924  |                  |         |
| Antiepileptics: Yes (ref: No)                                                                        | 0.47 (0.37-0.60) | <0.001  | 0.58 (0.41-0.80) | <0.001  |
| Antipsychotics: Yes (ref: No)                                                                        | 0.71 (0.49-1.04) | 0.0782  | 0.85 (0.60-1.21) | 0.3644  |
| Rhinological and throat antiseptics: Yes (ref: No)                                                   | 1.18 (1.08-1.30) | <0.001  | 1.15 (1.01-1.31) | 0.0289  |
| inhaled anti-obstructive drugs: Yes (ref: No)                                                        | 0.92 (0.73-1.16) | 0.4709  |                  |         |
| inhaled steroids: Yes (ref: No)                                                                      | 1.34 (0.99-1.80) | 0.0551  | 1.31 (1.00-1.72) | 0.0489  |
| other COPD drugs: Yes (ref: No)                                                                      | 0.75 (0.40-1.40) | 0.3688  |                  |         |
| Cold and Cough preparations: Yes (ref: No)                                                           | 1.02 (0.74-1.42) | 0.8942  |                  |         |
| Systemic Antihistamines: Yes (ref: No)                                                               | 1.16 (0.82-1.65) | 0.3905  |                  |         |

**Table S6: Results of simple and multivariable Cox models for hospital discharge after Influenza hospitalisation**

| Confounder                                                                                           | Simple           |         | Multivariable    |         |
|------------------------------------------------------------------------------------------------------|------------------|---------|------------------|---------|
|                                                                                                      | HR (CI)          | p-value | HR (CI)          | p-value |
| Age Group: 6-10 (ref: 0-5)                                                                           | 1.16 (1.09-1.24) | <0.001  | 1.23 (1.14-1.32) | <0.001  |
| Age Group: 11-15 (ref: 0-5)                                                                          | 1.21 (1.01-1.46) | 0.0409  | 1.31 (1.06-1.61) | 0.0120  |
| Age Group: 16-18 (ref: 0-5)                                                                          | 1.46 (1.22-1.75) | <0.001  | 1.54 (1.28-1.86) | <0.001  |
| Sex: W (ref: M)                                                                                      | 0.97 (0.89-1.05) | 0.4395  | 0.97 (0.89-1.06) | 0.4474  |
| Number Medication groups: 1 (ref: 0)                                                                 | 0.89 (0.80-0.99) | 0.0272  | 0.91 (0.81-1.01) | 0.0817  |
| Number Medication groups: >=2 (ref: 0)                                                               | 0.63 (0.54-0.73) | <0.001  | 0.80 (0.69-0.93) | 0.0029  |
| Wave                                                                                                 | 1.27 (1.05-1.54) | 0.0158  | 1.26 (1.01-1.58) | 0.0428  |
| Wave                                                                                                 | 1.28 (1.11-1.48) | <0.001  | 1.29 (1.10-1.51) | 0.0016  |
| Wave                                                                                                 | 1.34 (1.11-1.61) | 0.0027  | 1.32 (1.08-1.62) | 0.0069  |
| Wave                                                                                                 | 1.46 (1.23-1.73) | <0.001  | 1.45 (1.21-1.74) | <0.001  |
| Wave                                                                                                 | NA               | NA      | NA (NA-NA)       | NA      |
| Wave                                                                                                 | 0.83 (0.57-1.21) | 0.3305  | 0.83 (0.54-1.28) | 0.4058  |
| Anticoagulants: Yes (ref: No)                                                                        | 0.93 (0.51-1.70) | 0.8205  |                  |         |
| Antibiotics, Antivirals, Antiprotozoals or Anthelmintics: Yes (ref: No)                              | 1.02 (0.88-1.18) | 0.8297  |                  |         |
| Insulins and other Antidiabetics: Yes (ref: No)                                                      | 1.26 (0.76-2.10) | 0.3700  |                  |         |
| "heart" drugs: Yes (ref: No)                                                                         | 2.07 (1.06-4.04) | 0.0334  | 1.77 (0.90-3.49) | 0.1005  |
| Antihypertensives incl. Diuretics and Renin-angiotensin-aldosterone system inhibitors: Yes (ref: No) | 0.45 (0.21-0.94) | 0.0331  | 0.62 (0.36-1.07) | 0.0880  |
| Immunosuppressants and Immunomodulators: Yes (ref: No)                                               | 0.55 (0.26-1.16) | 0.1156  |                  |         |
| Systemic Steroids: Yes (ref: No)                                                                     | 0.88 (0.63-1.23) | 0.4662  |                  |         |
| Chemotherapy: Yes (ref: No)                                                                          | 0.67 (0.60-0.75) | <0.001  | 0.61 (0.42-0.88) | 0.0075  |
| Iron supplements, Erythropoietic stimulating agents, Vitamin B12, folic acid: Yes (ref: No)          | 0.72 (0.34-1.53) | 0.3986  |                  |         |
| Antacids incl. Antihistamines: Yes (ref: No)                                                         | 0.45 (0.31-0.66) | <0.001  | 0.51 (0.38-0.68) | <0.001  |
| Vitamin D and other Vitamin supplements: Yes (ref: No)                                               | 0.75 (0.67-0.84) | <0.001  | 0.76 (0.66-0.87) | <0.001  |
| Hormonal contraceptives and similar hormone preparations: Yes (ref: No)                              | 0.97 (0.80-1.18) | 0.7767  |                  |         |
| Interferons and CSF: Yes (ref: No)                                                                   | 1.16 (0.92-1.48) | 0.2097  |                  |         |
| NSAR and other anti-inflammatory drugs: Yes (ref: No)                                                | 0.99 (0.89-1.10) | 0.9071  |                  |         |
| Antiepileptics: Yes (ref: No)                                                                        | 0.51 (0.40-0.64) | <0.001  | 0.55 (0.45-0.68) | <0.001  |
| Antipsychotics: Yes (ref: No)                                                                        | 0.73 (0.58-0.92) | 0.0076  | 0.91 (0.77-1.06) | 0.2273  |
| Rhinological and throat antiseptics: Yes (ref: No)                                                   | 0.89 (0.81-0.97) | 0.0084  | 0.91 (0.79-1.04) | 0.1703  |
| inhaled anti-obstructive drugs: Yes (ref: No)                                                        | 0.84 (0.71-1.00) | 0.0476  | 0.89 (0.77-1.02) | 0.0957  |
| inhaled steroids: Yes (ref: No)                                                                      | 0.99 (0.82-1.19) | 0.8866  |                  |         |
| other COPD drugs: Yes (ref: No)                                                                      | 1.12 (0.96-1.32) | 0.1559  |                  |         |
| Cold and Cough preparations: Yes (ref: No)                                                           | 1.13 (0.92-1.38) | 0.2609  |                  |         |
| Systemic Antihistamines: Yes (ref: No)                                                               | 1.03 (0.79-1.33) | 0.8412  |                  |         |

**Figure S1: Kaplan-Meier curves and corresponding 95% confidence intervals for probability of hospital-discharge by age group within COVID-hospitalised (A) and Influenza-hospitalized (B) children.**

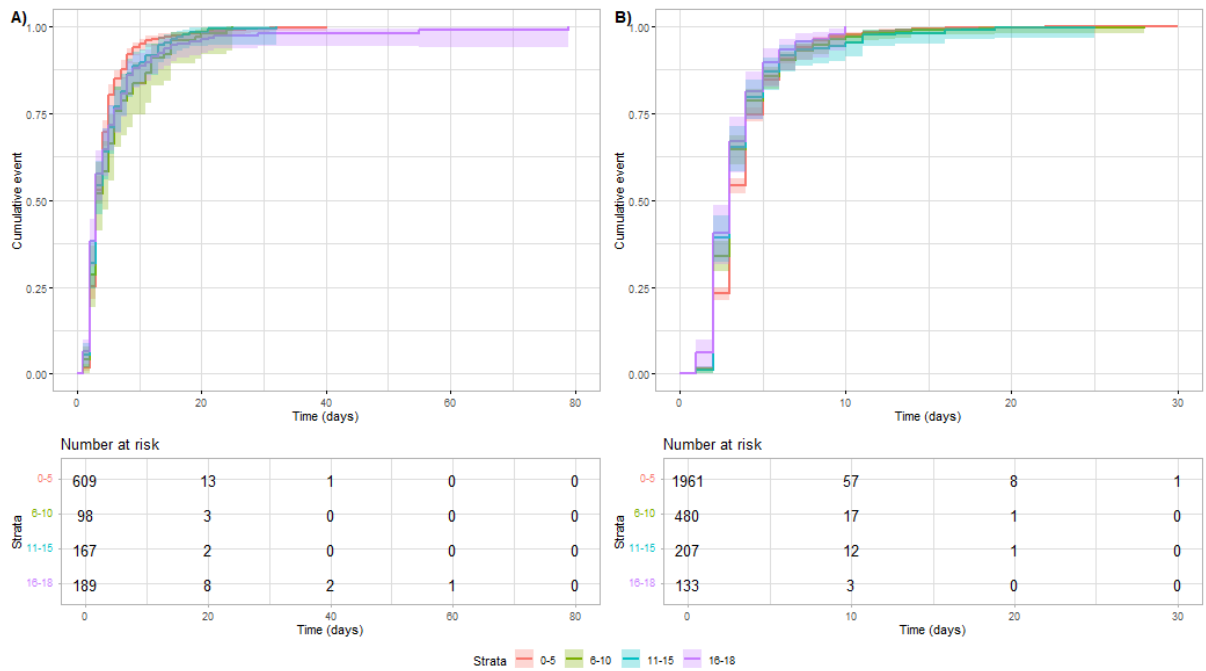

**Figure S2: Kaplan-Meier curves and corresponding 95% confidence intervals for probability of hospital-discharge for the number of medication groups within COVID- hospitalised (A) and Influenza-hospitalized (B) children.**

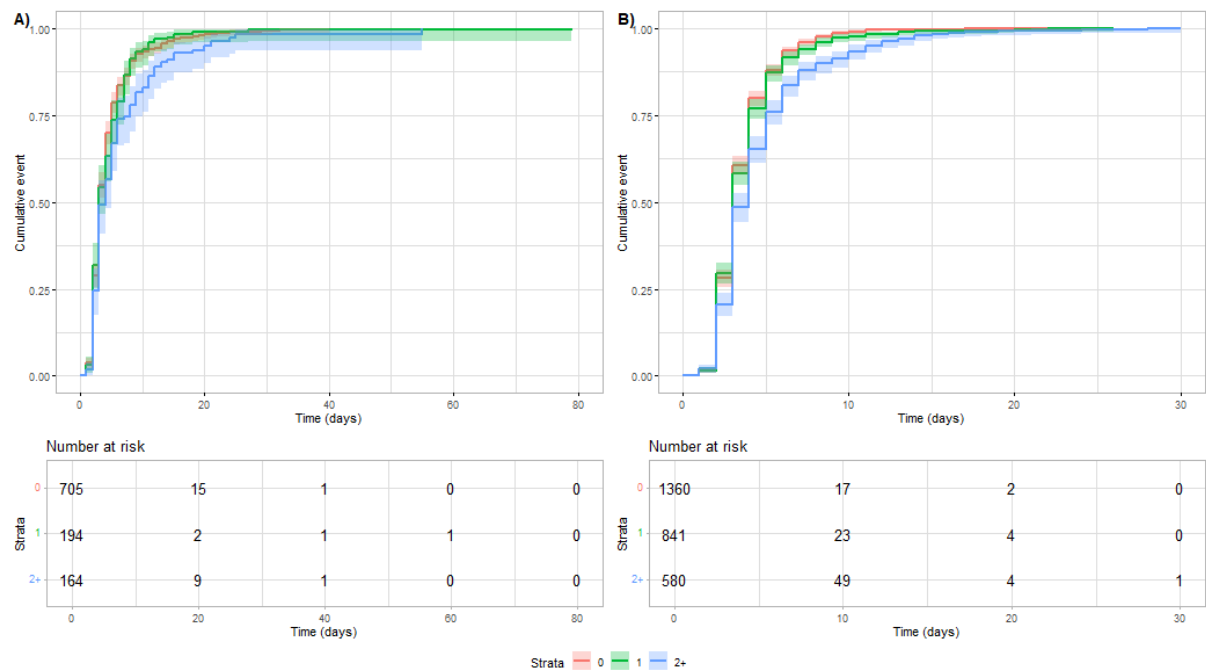

Table S7 shows the results of the simple and multivariable Cox-Regression models to evaluate associations between propensity score matched COVID-hospitalized children and Influenza-hospitalized children. Note that all confounder with a  $p < 0.1$  in the simple models were further investigated in the multivariable model.

**Table S7: Results of the simple and multivariable Cox regression models to compare COVID-19 and Influenza patients for hospital discharge.**

|                                                                                                             | Simple           |         | Multivariable    |         |
|-------------------------------------------------------------------------------------------------------------|------------------|---------|------------------|---------|
|                                                                                                             | HR (CI)          | p-value | HR (CI)          | p-value |
| <b>Group: Flu (ref: Covid)</b>                                                                              | 1.23 (0.95-1.57) | 0.111   | 1.22 (0.97-1.55) | 0.0928  |
| <b>Age Group: 6-10 (ref: 0-5)</b>                                                                           | 1.05 (0.92-1.21) | 0.4523  | 1.05 (0.91-1.22) | 0.4993  |
| <b>Age Group: 11-15 (ref: 0-5)</b>                                                                          | 1.09 (0.95-1.24) | 0.2256  | 1.09 (0.94-1.27) | 0.2335  |
| <b>Age Group: 16-18 (ref: 0-5)</b>                                                                          | 1.22 (1.04-1.45) | 0.0172  | 1.22 (1.00-1.49) | 0.0551  |
| <b>Sex: W (ref: M)</b>                                                                                      | 1.00 (0.92-1.08) | 0.9293  | 1.00 (0.92-1.10) | 0.9235  |
| <b>Number Medication groups: 1 (ref: 0)</b>                                                                 | 0.86 (0.76-0.97) | 0.0129  | 0.89 (0.78-1.01) | 0.0712  |
| <b>Number Medication groups: &gt;=2 (ref: 0)</b>                                                            | 0.73 (0.60-0.90) | 0.0032  | 0.83 (0.62-1.12) | 0.2267  |
| <b>Anticoagulants: Yes (ref: No)</b>                                                                        | 1.61 (0.82-3.14) | 0.1668  |                  |         |
| <b>Antibiotics, Antivirals, Antiprotozoals or Anthelmintics: Yes (ref: No)</b>                              | 1.06 (0.95-1.17) | 0.3104  |                  |         |
| <b>Insulins and other Antidiabetics: Yes (ref: No)</b>                                                      | 2.13 (0.78-5.77) | 0.1384  |                  |         |
| <b>"heart" drugs: Yes (ref: No)</b>                                                                         | 0.90 (0.55-1.46) | 0.6624  |                  |         |
| <b>Antihypertensives incl. Diuretics and Renin-angiotensin-aldosterone system inhibitors: Yes (ref: No)</b> | 0.48 (0.28-0.84) | 0.0102  | 0.84 (0.42-1.68) | 0.6174  |
| <b>Immunosuppressants and Immunomodulators: Yes (ref: No)</b>                                               | 0.81 (0.43-1.54) | 0.5221  |                  |         |
| <b>Systemic Steroids: Yes (ref: No)</b>                                                                     | 0.87 (0.69-1.10) | 0.255   |                  |         |
| <b>Chemotherapy: Yes (ref: No)</b>                                                                          | NA               | NA      |                  |         |
| <b>Iron supplements, Erythropoietic stimulating agents, Vitamin B12, folic acid: Yes (ref: No)</b>          | 1.06 (0.66-1.70) | 0.8139  |                  |         |
| <b>Antacids incl. Antihistamines: Yes (ref: No)</b>                                                         | 0.53 (0.42-0.67) | 0       | 0.76 (0.58-1.01) | 0.0544  |
| <b>Vitamin D and other Vitamin supplements: Yes (ref: No)</b>                                               | 0.69 (0.57-0.83) | 0.0001  | 0.70 (0.58-0.86) | 0.0005  |
| <b>Hormonal contraceptives and similar hormone preparations: Yes (ref: No)</b>                              | 1.14 (0.73-1.79) | 0.5604  |                  |         |
| <b>Interferons and CSF: Yes (ref: No)</b>                                                                   | 0.82 (0.53-1.25) | 0.3509  |                  |         |
| <b>NSAR and other anti-inflammatory drugs: Yes (ref: No)</b>                                                | 0.95 (0.71-1.28) | 0.7531  |                  |         |
| <b>Antiepileptics: Yes (ref: No)</b>                                                                        | 0.48 (0.32-0.73) | 0.0006  | 0.51 (0.27-0.97) | 0.0413  |
| <b>Antipsychotics: Yes (ref: No)</b>                                                                        | 0.91 (0.71-1.18) | 0.4781  |                  |         |
| <b>Rhinological and throat antiseptics: Yes (ref: No)</b>                                                   | 1.03 (0.97-1.09) | 0.3588  |                  |         |
| <b>inhaled anti-obstructive drugs: Yes (ref: No)</b>                                                        | 1.00 (0.63-1.59) | 0.9995  |                  |         |
| <b>inhaled steroids: Yes (ref: No)</b>                                                                      | 1.33 (0.95-1.84) | 0.092   | 1.25 (0.92-1.70) | 0.1567  |
| <b>other COPD drugs: Yes (ref: No)</b>                                                                      | 0.65 (0.48-0.89) | 0.0076  | 0.63 (0.47-0.84) | 0.0017  |
| <b>Cold and Cough preparations: Yes (ref: No)</b>                                                           | 0.90 (0.77-1.05) | 0.1699  |                  |         |
| <b>Systemic Antihistamines: Yes (ref: No)</b>                                                               | 1.37 (1.07-1.75) | 0.014   | 1.23 (0.96-1.58) | 0.107   |

## Outcome: Readmission due to any reason after hospital discharge

Tables S8 shows the numbers and percentages of patients with and without readmission, separately for COVID-hospitalized patients, Influenza-hospitalized patients with their respectively age-, sex- and region- matched controls.

Tables S9 shows the numbers and percentages of patients with and without readmission, for COVID-hospitalized patients and Influenza-hospitalized patients before and after propensity score matching.

**Table S8: Readmission for COVID-19 and Influenza hospitalized children as compared to controls before propensity score matching**

|        |       |          | COVID       |            |                |            | Influenza       |             |                |            |
|--------|-------|----------|-------------|------------|----------------|------------|-----------------|-------------|----------------|------------|
|        |       |          | COVID (all) |            | Controls (all) |            | Influenza (all) |             | Controls (all) |            |
|        |       |          | No          | Yes        | No             | Yes        | No              | Yes         | No             | Yes        |
| Sex    | Age   | Time     | n (%)       | n (%)      | n (%)          | n (%)      | n (%)           | n (%)       | n (%)          | n (%)      |
| Male   | 0-5   | 30-day   | 325 (96.15) | 13 (3.85)  | 3322 (98.49)   | 51 (1.51)  | 1021 (96.14)    | 41 (3.86)   | 10458 (99.17)  | 87 (0.83)  |
|        |       | 180-day  | 311 (92.01) | 27 (7.99)  | 3225 (95.61)   | 148 (4.39) | 916 (86.25)     | 146 (13.75) | 10175 (96.49)  | 370 (3.51) |
|        |       | 1-year   | 298 (88.17) | 40 (11.83) | 3179 (94.25)   | 194 (5.75) | 839 (79)        | 223 (21)    | 9894 (93.83)   | 651 (6.17) |
|        |       | 1.5-year | 298 (88.17) | 40 (11.83) | 3168 (93.92)   | 205 (6.08) | 839 (79)        | 223 (21)    | 9656 (91.57)   | 889 (8.43) |
|        | 6-10  | 30-day   | 40 (95.24)  | 2 (4.76)   | 429 (99.77)    | 1 (0.23)   | 257 (95.19)     | 13 (4.81)   | 2690 (99.59)   | 11 (0.41)  |
|        |       | 180-day  | 33 (78.57)  | 9 (21.43)  | 424 (98.6)     | 6 (1.4)    | 233 (86.3)      | 37 (13.7)   | 2666 (98.7)    | 35 (1.3)   |
|        |       | 1-year   | 31 (73.81)  | 11 (26.19) | 420 (97.67)    | 10 (2.33)  | 213 (78.89)     | 57 (21.11)  | 2632 (97.45)   | 69 (2.55)  |
|        |       | 1.5-year | 31 (73.81)  | 11 (26.19) | 418 (97.21)    | 12 (2.79)  | 213 (78.89)     | 57 (21.11)  | 2591 (95.93)   | 110 (4.07) |
|        | 11-15 | 30-day   | 75 (94.94)  | 4 (5.06)   | 804 (99.5)     | 4 (0.5)    | 112 (96.55)     | 4 (3.45)    | 1159 (99.91)   | 1 (0.09)   |
|        |       | 180-day  | 66 (83.54)  | 13 (16.46) | 796 (98.51)    | 12 (1.49)  | 100 (86.21)     | 16 (13.79)  | 1145 (98.71)   | 15 (1.29)  |
|        |       | 1-year   | 66 (83.54)  | 13 (16.46) | 793 (98.14)    | 15 (1.86)  | 91 (78.45)      | 25 (21.55)  | 1128 (97.24)   | 32 (2.76)  |
|        |       | 1.5-year | 66 (83.54)  | 13 (16.46) | 793 (98.14)    | 15 (1.86)  | 91 (78.45)      | 25 (21.55)  | 1112 (95.86)   | 48 (4.14)  |
|        | 16-18 | 30-day   | 61 (91.04)  | 6 (8.96)   | 691 (99.14)    | 6 (0.86)   | 58 (92.06)      | 5 (7.94)    | 627 (99.84)    | 1 (0.16)   |
|        |       | 180-day  | 58 (86.57)  | 9 (13.43)  | 680 (97.56)    | 17 (2.44)  | 51 (80.95)      | 12 (19.05)  | 618 (98.41)    | 10 (1.59)  |
|        |       | 1-year   | 55 (82.09)  | 12 (17.91) | 676 (96.99)    | 21 (3.01)  | 48 (76.19)      | 15 (23.81)  | 605 (96.34)    | 23 (3.66)  |
|        |       | 1.5-year | 55 (82.09)  | 12 (17.91) | 675 (96.84)    | 22 (3.16)  | 48 (76.19)      | 15 (23.81)  | 597 (95.06)    | 31 (4.94)  |
| Female | 0-5   | 30-day   | 256 (96.24) | 10 (3.76)  | 2695 (99.26)   | 20 (0.74)  | 862 (96.1)      | 35 (3.9)    | 8826 (99.17)   | 74 (0.83)  |
|        |       | 180-day  | 243 (91.35) | 23 (8.65)  | 2637 (97.13)   | 78 (2.87)  | 797 (88.85)     | 100 (11.15) | 8652 (97.21)   | 248 (2.79) |
|        |       | 1-year   | 236 (88.72) | 30 (11.28) | 2609 (96.1)    | 106 (3.9)  | 743 (82.83)     | 154 (17.17) | 8468 (95.15)   | 432 (4.85) |
|        |       | 1.5-year | 236 (88.72) | 30 (11.28) | 2606 (95.99)   | 109 (4.01) | 742 (82.72)     | 155 (17.28) | 8356 (93.89)   | 544 (6.11) |
|        | 6-10  | 30-day   | 53 (94.64)  | 3 (5.36)   | 558 (99.64)    | 2 (0.36)   | 199 (96.6)      | 7 (3.4)     | 2087 (99.81)   | 4 (0.19)   |
|        |       | 180-day  | 49 (87.5)   | 7 (12.5)   | 556 (99.29)    | 4 (0.71)   | 184 (89.32)     | 22 (10.68)  | 2067 (98.85)   | 24 (1.15)  |
|        |       | 1-year   | 49 (87.5)   | 7 (12.5)   | 556 (99.29)    | 4 (0.71)   | 173 (83.98)     | 33 (16.02)  | 2046 (97.85)   | 45 (2.15)  |
|        |       | 1.5-year | 49 (87.5)   | 7 (12.5)   | 556 (99.29)    | 4 (0.71)   | 173 (83.98)     | 33 (16.02)  | 2026 (96.89)   | 65 (3.11)  |
|        | 11-15 | 30-day   | 80 (93.02)  | 6 (6.98)   | 854 (99.53)    | 4 (0.47)   | 84 (92.31)      | 7 (7.69)    | 907 (99.78)    | 2 (0.22)   |
|        |       | 180-day  | 71 (82.56)  | 15 (17.44) | 843 (98.25)    | 15 (1.75)  | 74 (81.32)      | 17 (18.68)  | 897 (98.68)    | 12 (1.32)  |
|        |       | 1-year   | 69 (80.23)  | 17 (19.77) | 833 (97.09)    | 25 (2.91)  | 63 (69.23)      | 28 (30.77)  | 886 (97.47)    | 23 (2.53)  |
|        |       | 1.5-year | 69 (80.23)  | 17 (19.77) | 832 (96.97)    | 26 (3.03)  | 63 (69.23)      | 28 (30.77)  | 869 (95.6)     | 40 (4.4)   |
|        | 16-18 | 30-day   | 111 (93.28) | 8 (6.72)   | 1179 (99.49)   | 6 (0.51)   | 68 (97.14)      | 2 (2.86)    | 697 (99.71)    | 2 (0.29)   |
|        |       | 180-day  | 103 (86.55) | 16 (13.45) | 1166 (98.4)    | 19 (1.6)   | 60 (85.71)      | 10 (14.29)  | 692 (99)       | 7 (1)      |
|        |       | 1-year   | 100 (84.03) | 19 (15.97) | 1157 (97.64)   | 28 (2.36)  | 51 (72.86)      | 19 (27.14)  | 681 (97.42)    | 18 (2.58)  |
|        |       | 1.5-year | 100 (84.03) | 19 (15.97) | 1153 (97.3)    | 32 (2.7)   | 51 (72.86)      | 19 (27.14)  | 671 (95.99)    | 28 (4.01)  |

**Table S9: Readmission for COVID-19 and Influenza hospitalized children as compared to controls after propensity score matching**

|        |       |          | All patients |            |                 |             | Patients after PSM |            |                 |            |
|--------|-------|----------|--------------|------------|-----------------|-------------|--------------------|------------|-----------------|------------|
|        |       |          | COVID (all)  |            | Influenza (all) |             | COVID (PSM)        |            | Influenza (PSM) |            |
|        |       |          | No           | Yes        | No              | Yes         | No                 | Yes        | No              | Yes        |
| Sex    | Age   | Time     | n (%)        | n (%)      | n (%)           | n (%)       | n (%)              | n (%)      | n (%)           | n (%)      |
| Male   | 0-5   | 30-day   | 325 (96.15)  | 13 (3.85)  | 1021 (96.14)    | 41 (3.86)   | 318 (96.36)        | 12 (3.64)  | 315 (94.88)     | 17 (5.12)  |
|        |       | 180-day  | 311 (92.01)  | 27 (7.99)  | 916 (86.25)     | 146 (13.75) | 305 (92.42)        | 25 (7.58)  | 291 (87.65)     | 41 (12.35) |
|        |       | 1-year   | 298 (88.17)  | 40 (11.83) | 839 (79)        | 223 (21)    | 292 (88.48)        | 38 (11.52) | 273 (82.23)     | 59 (17.77) |
|        |       | 1.5-year | 298 (88.17)  | 40 (11.83) | 839 (79)        | 223 (21)    | 292 (88.48)        | 38 (11.52) | 273 (82.23)     | 59 (17.77) |
|        | 6-10  | 30-day   | 40 (95.24)   | 2 (4.76)   | 257 (95.19)     | 13 (4.81)   | 36 (94.74)         | 2 (5.26)   | 39 (90.7)       | 4 (9.3)    |
|        |       | 180-day  | 33 (78.57)   | 9 (21.43)  | 233 (86.3)      | 37 (13.7)   | 30 (78.95)         | 8 (21.05)  | 37 (86.05)      | 6 (13.95)  |
|        |       | 1-year   | 31 (73.81)   | 11 (26.19) | 213 (78.89)     | 57 (21.11)  | 28 (73.68)         | 10 (26.32) | 33 (76.74)      | 10 (23.26) |
|        |       | 1.5-year | 31 (73.81)   | 11 (26.19) | 213 (78.89)     | 57 (21.11)  | 28 (73.68)         | 10 (26.32) | 33 (76.74)      | 10 (23.26) |
|        | 11-15 | 30-day   | 75 (94.94)   | 4 (5.06)   | 112 (96.55)     | 4 (3.45)    | 56 (96.55)         | 2 (3.45)   | 52 (98.11)      | 1 (1.89)   |
|        |       | 180-day  | 66 (83.54)   | 13 (16.46) | 100 (86.21)     | 16 (13.79)  | 52 (89.66)         | 6 (10.34)  | 48 (90.57)      | 5 (9.43)   |
|        |       | 1-year   | 66 (83.54)   | 13 (16.46) | 91 (78.45)      | 25 (21.55)  | 52 (89.66)         | 6 (10.34)  | 46 (86.79)      | 7 (13.21)  |
|        |       | 1.5-year | 66 (83.54)   | 13 (16.46) | 91 (78.45)      | 25 (21.55)  | 52 (89.66)         | 6 (10.34)  | 46 (86.79)      | 7 (13.21)  |
|        | 16-18 | 30-day   | 61 (91.04)   | 6 (8.96)   | 58 (92.06)      | 5 (7.94)    | 38 (90.48)         | 4 (9.52)   | 34 (91.89)      | 3 (8.11)   |
|        |       | 180-day  | 58 (86.57)   | 9 (13.43)  | 51 (80.95)      | 12 (19.05)  | 37 (88.1)          | 5 (11.9)   | 30 (81.08)      | 7 (18.92)  |
|        |       | 1-year   | 55 (82.09)   | 12 (17.91) | 48 (76.19)      | 15 (23.81)  | 35 (83.33)         | 7 (16.67)  | 29 (78.38)      | 8 (21.62)  |
|        |       | 1.5-year | 55 (82.09)   | 12 (17.91) | 48 (76.19)      | 15 (23.81)  | 35 (83.33)         | 7 (16.67)  | 29 (78.38)      | 8 (21.62)  |
| Female | 0-5   | 30-day   | 256 (96.24)  | 10 (3.76)  | 862 (96.1)      | 35 (3.9)    | 248 (96.5)         | 9 (3.5)    | 259 (97.74)     | 6 (2.26)   |
|        |       | 180-day  | 243 (91.35)  | 23 (8.65)  | 797 (88.85)     | 100 (11.15) | 236 (91.83)        | 21 (8.17)  | 242 (91.32)     | 23 (8.68)  |
|        |       | 1-year   | 236 (88.72)  | 30 (11.28) | 743 (82.83)     | 154 (17.17) | 229 (89.11)        | 28 (10.89) | 233 (87.92)     | 32 (12.08) |
|        |       | 1.5-year | 236 (88.72)  | 30 (11.28) | 742 (82.72)     | 155 (17.28) | 229 (89.11)        | 28 (10.89) | 233 (87.92)     | 32 (12.08) |
|        | 6-10  | 30-day   | 53 (94.64)   | 3 (5.36)   | 199 (96.6)      | 7 (3.4)     | 49 (94.23)         | 3 (5.77)   | 54 (100)        | 0 (0.0)    |
|        |       | 180-day  | 49 (87.5)    | 7 (12.5)   | 184 (89.32)     | 22 (10.68)  | 47 (90.38)         | 5 (9.62)   | 52 (96.3)       | 2 (3.7)    |
|        |       | 1-year   | 49 (87.5)    | 7 (12.5)   | 173 (83.98)     | 33 (16.02)  | 47 (90.38)         | 5 (9.62)   | 49 (90.74)      | 5 (9.26)   |
|        |       | 1.5-year | 49 (87.5)    | 7 (12.5)   | 173 (83.98)     | 33 (16.02)  | 47 (90.38)         | 5 (9.62)   | 49 (90.74)      | 5 (9.26)   |
|        | 11-15 | 30-day   | 80 (93.02)   | 6 (6.98)   | 84 (92.31)      | 7 (7.69)    | 56 (91.8)          | 5 (8.2)    | 53 (94.64)      | 3 (5.36)   |
|        |       | 180-day  | 71 (82.56)   | 15 (17.44) | 74 (81.32)      | 17 (18.68)  | 49 (80.33)         | 12 (19.67) | 46 (82.14)      | 10 (17.86) |
|        |       | 1-year   | 69 (80.23)   | 17 (19.77) | 63 (69.23)      | 28 (30.77)  | 47 (77.05)         | 14 (22.95) | 40 (71.43)      | 16 (28.57) |
|        |       | 1.5-year | 69 (80.23)   | 17 (19.77) | 63 (69.23)      | 28 (30.77)  | 47 (77.05)         | 14 (22.95) | 40 (71.43)      | 16 (28.57) |
|        | 16-18 | 30-day   | 111 (93.28)  | 8 (6.72)   | 68 (97.14)      | 2 (2.86)    | 49 (89.09)         | 6 (10.91)  | 51 (98.08)      | 1 (1.92)   |
|        |       | 180-day  | 103 (86.55)  | 16 (13.45) | 60 (85.71)      | 10 (14.29)  | 46 (83.64)         | 9 (16.36)  | 44 (84.62)      | 8 (15.38)  |
|        |       | 1-year   | 100 (84.03)  | 19 (15.97) | 51 (72.86)      | 19 (27.14)  | 44 (80)            | 11 (20)    | 37 (71.15)      | 15 (28.85) |
|        |       | 1.5-year | 100 (84.03)  | 19 (15.97) | 51 (72.86)      | 19 (27.14)  | 44 (80)            | 11 (20)    | 37 (71.15)      | 15 (28.85) |



Tables **S10** and **S11** show the results of the simple and multivariable Cox-Regression models to evaluate associations between medication groups and readmission due to any reason, separately for COVID-hospitalized children (**S12**) and Influenza-hospitalized children (**S13**). Note that all confounder with a  $p < 0.1$  in the simple models were further investigated in the multivariable model.

**Table S10: Results of simple and multivariable Cox models for readmission after COVID-19 hospitalisation**

| Confounder                                                                                           | Simple            |         | Multivariable    |         |
|------------------------------------------------------------------------------------------------------|-------------------|---------|------------------|---------|
|                                                                                                      | HR (CI)           | p-value | HR (CI)          | p-value |
| Age Group: 6-10 (ref: 0-5)                                                                           | 1.13 (0.61-2.07)  | 0.7057  | 1.02 (0.61-1.71) | 0.9420  |
| Age Group: 11-15 (ref: 0-5)                                                                          | 1.11 (0.70-1.74)  | 0.6630  | 1.16 (0.76-1.77) | 0.4999  |
| Age Group: 16-18 (ref: 0-5)                                                                          | 0.94 (0.61-1.45)  | 0.7817  | 1.05 (0.67-1.63) | 0.8466  |
| Sex: W (ref: M)                                                                                      | 0.94 (0.67-1.30)  | 0.6920  | 0.94 (0.68-1.30) | 0.6980  |
| Number Medication groups: 1 (ref: 0)                                                                 | 1.27 (1.01-1.60)  | 0.0435  | 1.16 (0.89-1.50) | 0.2703  |
| Number Medication groups: $\geq 2$ (ref: 0)                                                          | 2.93 (2.04-4.21)  | <0.001  | 1.96 (1.39-2.78) | <0.001  |
| Wave                                                                                                 | 1.02 (0.75-1.40)  | 0.8828  | 1.04 (0.74-1.44) | 0.8353  |
| Wave                                                                                                 | 0.44 (0.26-0.74)  | 0.0023  | 0.43 (0.24-0.77) | 0.0043  |
| Length of hospital stay                                                                              | 1.03 (1.02-1.04)  | <0.001  | 1.03 (1.02-1.03) | <0.001  |
| Anticoagulants: Yes (ref: No)                                                                        | 0.64 (0.29-1.40)  | 0.2609  |                  |         |
| Antibiotics, Antivirals, Antiprotozoals or Anthelmintics: Yes (ref: No)                              | 1.28 (0.78-2.11)  | 0.3342  |                  |         |
| Insulins and other Antidiabetics: Yes (ref: No)                                                      | 1.44 (0.10-21.09) | 0.7922  |                  |         |
| "heart" drugs: Yes (ref: No)                                                                         | NA (NA-NA)        | NA      |                  |         |
| Antihypertensives incl. Diuretics and Renin-angiotensin-aldosterone system inhibitors: Yes (ref: No) | NA (NA-NA)        | NA      |                  |         |
| Immunosuppressants and Immunomodulators: Yes (ref: No)                                               | 0.38 (0.06-2.32)  | 0.2916  |                  |         |
| Systemic Steroids: Yes (ref: No)                                                                     | 1.57 (1.04-2.38)  | 0.0308  | 1.42 (0.84-2.41) | 0.1936  |
| Chemotherapy: Yes (ref: No)                                                                          | 2.45 (1.03-5.82)  | 0.0423  | 2.56 (0.95-6.95) | 0.0642  |
| Iron supplements, Erythropoietic stimulating agents, Vitamin B12, folic acid: Yes (ref: No)          | 1.50 (0.55-4.07)  | 0.4249  |                  |         |
| Antacids incl. Antihistamines: Yes (ref: No)                                                         | 2.01 (0.86-4.68)  | 0.1070  |                  |         |
| Vitamin D and other Vitamin supplements: Yes (ref: No)                                               | 1.01 (0.64-1.60)  | 0.9536  |                  |         |
| Hormonal contraceptives and similar hormone preparations: Yes (ref: No)                              | 2.31 (1.35-3.94)  | 0.0021  | 2.53 (1.48-4.33) | <0.001  |
| Interferons and CSF: Yes (ref: No)                                                                   | 2.82 (1.41-5.63)  | 0.0034  | 1.74 (0.51-5.94) | 0.3761  |
| NSAR and other anti-inflammatory drugs: Yes (ref: No)                                                | 0.79 (0.56-1.11)  | 0.1671  |                  |         |
| Antiepileptics: Yes (ref: No)                                                                        | 2.81 (1.52-5.20)  | <0.001  | 2.24 (0.88-5.68) | 0.0900  |
| Antipsychotics: Yes (ref: No)                                                                        | 1.82 (0.97-3.41)  | 0.0642  | 1.47 (0.45-4.78) | 0.5223  |
| Rhinological and throat antiseptics: Yes (ref: No)                                                   | 0.93 (0.48-1.79)  | 0.8206  |                  |         |
| inhaled anti-obstructive drugs: Yes (ref: No)                                                        | 0.98 (0.54-1.77)  | 0.9360  |                  |         |
| inhaled steroids: Yes (ref: No)                                                                      | 0.63 (0.35-1.12)  | 0.1163  |                  |         |
| other COPD drugs: Yes (ref: No)                                                                      | 2.25 (1.17-4.35)  | 0.0157  | 2.70 (1.46-5.01) | 0.0016  |
| Cold and Cough preparations: Yes (ref: No)                                                           | 0.74 (0.34-1.61)  | 0.4428  |                  |         |
| Systemic Antihistamines: Yes (ref: No)                                                               | 0.60 (0.27-1.33)  | 0.2056  |                  |         |

**Table S11: Results of simple and multivariable Cox models for readmission after Influenza hospitalisation**

| Confounder                                                                                           | Simple            |         | Multivariable    |         |
|------------------------------------------------------------------------------------------------------|-------------------|---------|------------------|---------|
|                                                                                                      | HR (CI)           | p-value | HR (CI)          | p-value |
| Age Group: 6-10 (ref: 0-5)                                                                           | 1.01 (0.80-1.27)  | 0.9549  | 0.93 (0.75-1.15) | 0.4869  |
| Age Group: 11-15 (ref: 0-5)                                                                          | 1.40 (1.10-1.79)  | 0.0071  | 1.18 (0.86-1.62) | 0.3052  |
| Age Group: 16-18 (ref: 0-5)                                                                          | 1.31 (1.10-1.57)  | 0.0026  | 1.23 (1.02-1.47) | 0.0271  |
| Sex: W (ref: M)                                                                                      | 0.87 (0.73-1.03)  | 0.1155  | 0.88 (0.74-1.04) | 0.1197  |
| Number Medication groups: 1 (ref: 0)                                                                 | 1.37 (1.09-1.72)  | 0.0066  | 1.33 (1.06-1.67) | 0.0132  |
| Number Medication groups: ≥ 2 (ref: 0)                                                               | 2.15 (1.89-2.45)  | <0.001  | 1.57 (1.23-2.02) | <0.001  |
| Wave                                                                                                 | 0.99 (0.79-1.24)  | 0.9316  | 0.98 (0.77-1.25) | 0.8931  |
| Wave                                                                                                 | 0.65 (0.50-0.86)  | 0.0023  | 0.65 (0.50-0.85) | 0.0016  |
| Length of hospital stay                                                                              | 1.11 (1.09-1.13)  | <0.001  | 1.10 (1.08-1.12) | <0.001  |
| Anticoagulants: Yes (ref: No)                                                                        | 2.92 (1.40-6.07)  | 0.0041  | 2.75 (1.04-7.27) | 0.0412  |
| Antibiotics, Antivirals, Antiprotozoals or Anthelmintics: Yes (ref: No)                              | 0.96 (0.71-1.29)  | 0.7663  |                  |         |
| Insulins and other Antidiabetics: Yes (ref: No)                                                      | 0.72 (0.22-2.35)  | 0.5884  |                  |         |
| "heart" drugs: Yes (ref: No)                                                                         | 0.79 (0.25-2.51)  | 0.6877  |                  |         |
| Antihypertensives incl. Diuretics and Renin-angiotensin-aldosterone system inhibitors: Yes (ref: No) | 0.71 (0.33-1.55)  | 0.3927  |                  |         |
| Immunosuppressants and Immunomodulators: Yes (ref: No)                                               | 1.02 (0.32-3.31)  | 0.9681  |                  |         |
| Systemic Steroids: Yes (ref: No)                                                                     | 1.17 (0.86-1.60)  | 0.3085  |                  |         |
| Chemotherapy: Yes (ref: No)                                                                          | 6.97 (4.72-10.31) | <0.001  | 6.33 (4.39-9.13) | <0.001  |
| Iron supplements, Erythropoietic stimulating agents, Vitamin B12, folic acid: Yes (ref: No)          | 0.70 (0.35-1.37)  | 0.2942  |                  |         |
| Antacids incl. Antihistamines: Yes (ref: No)                                                         | 1.72 (1.09-2.71)  | 0.0191  | 1.77 (1.28-2.44) | <0.001  |
| Vitamin D and other Vitamin supplements: Yes (ref: No)                                               | 1.06 (0.74-1.53)  | 0.7481  |                  |         |
| Hormonal contraceptives and similar hormone preparations: Yes (ref: No)                              | 1.22 (0.51-2.95)  | 0.6524  |                  |         |
| Interferons and CSF: Yes (ref: No)                                                                   | 1.31 (0.76-2.27)  | 0.3311  |                  |         |
| NSAR and other anti-inflammatory drugs: Yes (ref: No)                                                | 0.96 (0.81-1.14)  | 0.6398  |                  |         |
| Antiepileptics: Yes (ref: No)                                                                        | 2.64 (2.06-3.39)  | <0.001  | 2.09 (1.73-2.53) | <0.001  |
| Antipsychotics: Yes (ref: No)                                                                        | 1.91 (1.74-2.09)  | <0.001  | 1.44 (1.29-1.61) | <0.001  |
| Rhinological and throat antiseptics: Yes (ref: No)                                                   | 1.06 (0.85-1.32)  | 0.6161  |                  |         |
| inhaled anti-obstructive drugs: Yes (ref: No)                                                        | 1.40 (1.20-1.63)  | <0.001  | 1.51 (1.20-1.90) | <0.001  |
| inhaled steroids: Yes (ref: No)                                                                      | 0.87 (0.64-1.19)  | 0.3860  |                  |         |
| other COPD drugs: Yes (ref: No)                                                                      | 0.68 (0.36-1.30)  | 0.2481  |                  |         |
| Cold and Cough preparations: Yes (ref: No)                                                           | 0.80 (0.58-1.11)  | 0.1791  |                  |         |
| Systemic Antihistamines: Yes (ref: No)                                                               | 0.72 (0.51-1.01)  | 0.0556  | 0.77 (0.51-1.16) | 0.2037  |

Table S12 shows the results of the simple and multivariable Cox-Regression models to evaluate associations between propensity score matched COVID-hospitalized children and Influenza-hospitalized children. Note that all confounder with a  $p < 0.1$  in the simple models were further investigated in the multivariable model.

**Table S12: Results of the simple and multivariable Cox regression models to compare re-admission due to any reason after between groups.**

| Confounder                                                                                                  | Simple           |          | Multivariable    |          |
|-------------------------------------------------------------------------------------------------------------|------------------|----------|------------------|----------|
|                                                                                                             | HR (CI)          | p- value | HR (CI)          | p- value |
| <b>Group: Flu (ref: Covid)</b>                                                                              | 1.24 (1.04-1.47) | 0.0156   | 1.23 (1.03-1.47) | 0.0214   |
| <b>Age Group: 6-10 (ref: 0-5)</b>                                                                           | 0.99 (0.67-1.48) | 0.9695   | 0.97 (0.65-1.46) | 0.892    |
| <b>Age Group: 11-15 (ref: 0-5)</b>                                                                          | 1.35 (0.88-2.07) | 0.1631   | 1.34 (0.87-2.09) | 0.1861   |
| <b>Age Group: 16-18 (ref: 0-5)</b>                                                                          | 1.30 (0.97-1.75) | 0.0787   | 1.26 (0.91-1.77) | 0.1678   |
| <b>Sex: W (ref: M)</b>                                                                                      | 0.88 (0.64-1.23) | 0.4656   | 0.88 (0.64-1.21) | 0.4319   |
| <b>Number Medication groups: 1 (ref: 0)</b>                                                                 | 1.53 (1.14-2.04) | 0.0042   | 1.48 (1.09-2.01) | 0.0131   |
| <b>Number Medication groups: &gt;=2 (ref: 0)</b>                                                            | 2.51 (1.89-3.33) | 0        | 2.06 (1.55-2.73) | 0        |
| <b>Length of hospital stay (days)</b>                                                                       | 1.03 (1.01-1.06) | 0.0078   | 1.03 (1.01-1.06) | 0.0106   |
| <b>Anticoagulants: Yes (ref: No)</b>                                                                        | 1.76 (0.90-3.42) | 0.0986   | 1.03 (0.38-2.77) | 0.9596   |
| <b>Antibiotics, Antivirals, Antiprotozoals or Anthelmintics: Yes (ref: No)</b>                              | 0.87 (0.63-1.21) | 0.421    |                  |          |
| <b>Insulins and other Antidiabetics: Yes (ref: No)</b>                                                      | 0.86 (0.08-8.95) | 0.9026   |                  |          |
| <b>"heart" drugs: Yes (ref: No)</b>                                                                         | NA               | NA       | NA               | NA       |
| <b>Antihypertensives incl. Diuretics and Renin-angiotensin-aldosterone system inhibitors: Yes (ref: No)</b> | 0.85 (0.38-1.89) | 0.6938   |                  |          |
| <b>Immunosuppressants and Immunomodulators: Yes (ref: No)</b>                                               | 2.16 (0.86-5.42) | 0.101    |                  |          |
| <b>Systemic Steroids: Yes (ref: No)</b>                                                                     | 1.25 (0.66-2.36) | 0.489    |                  |          |
| <b>Chemotherapy: Yes (ref: No)</b>                                                                          | NA               | NA       |                  |          |
| <b>Iron supplements, Erythropoietic stimulating agents, Vitamin B12, folic acid: Yes (ref: No)</b>          | 1.24 (0.42-3.73) | 0.6962   |                  |          |
| <b>Antacids incl. Antihistamines: Yes (ref: No)</b>                                                         | 3.13 (1.25-7.83) | 0.0146   | 2.10 (0.65-6.80) | 0.2177   |
| <b>Vitamin D and other Vitamin supplements: Yes (ref: No)</b>                                               | 1.28 (0.89-1.85) | 0.1866   |                  |          |
| <b>Hormonal contraceptives and similar hormone preparations: Yes (ref: No)</b>                              | 1.36 (0.44-4.18) | 0.5942   |                  |          |
| <b>Interferons and CSF: Yes (ref: No)</b>                                                                   | 2.15 (1.20-3.87) | 0.0106   | 2.21 (1.13-4.34) | 0.0207   |
| <b>NSAR and other anti-inflammatory drugs: Yes (ref: No)</b>                                                | 0.75 (0.47-1.22) | 0.2466   |                  |          |
| <b>Antiepileptics: Yes (ref: No)</b>                                                                        | 2.83 (1.81-4.44) | 0        | 2.13 (1.17-3.86) | 0.0128   |
| <b>Antipsychotics: Yes (ref: No)</b>                                                                        | 2.02 (1.52-2.69) | 0        | 1.47 (0.79-2.73) | 0.2277   |
| <b>Rhinological and throat antiseptics: Yes (ref: No)</b>                                                   | 0.90 (0.68-1.20) | 0.4764   |                  |          |
| <b>inhaled anti-obstructive drugs: Yes (ref: No)</b>                                                        | 1.34 (0.79-2.26) | 0.2797   |                  |          |
| <b>inhaled steroids: Yes (ref: No)</b>                                                                      | 0.80 (0.38-1.69) | 0.5547   |                  |          |
| <b>other COPD drugs: Yes (ref: No)</b>                                                                      | 0.82 (0.52-1.31) | 0.4131   |                  |          |
| <b>Cold and Cough preparations: Yes (ref: No)</b>                                                           | 0.61 (0.32-1.17) | 0.1365   |                  |          |
| <b>Systemic Antihistamines: Yes (ref: No)</b>                                                               | 0.90 (0.49-1.66) | 0.7438   |                  |          |

**Figure S3: Kaplan-Meier curves and corresponding 95% confidence intervals for probability of readmission by age group within COVID-hospitalised (A) and Influenza-hospitalized (B) children.**

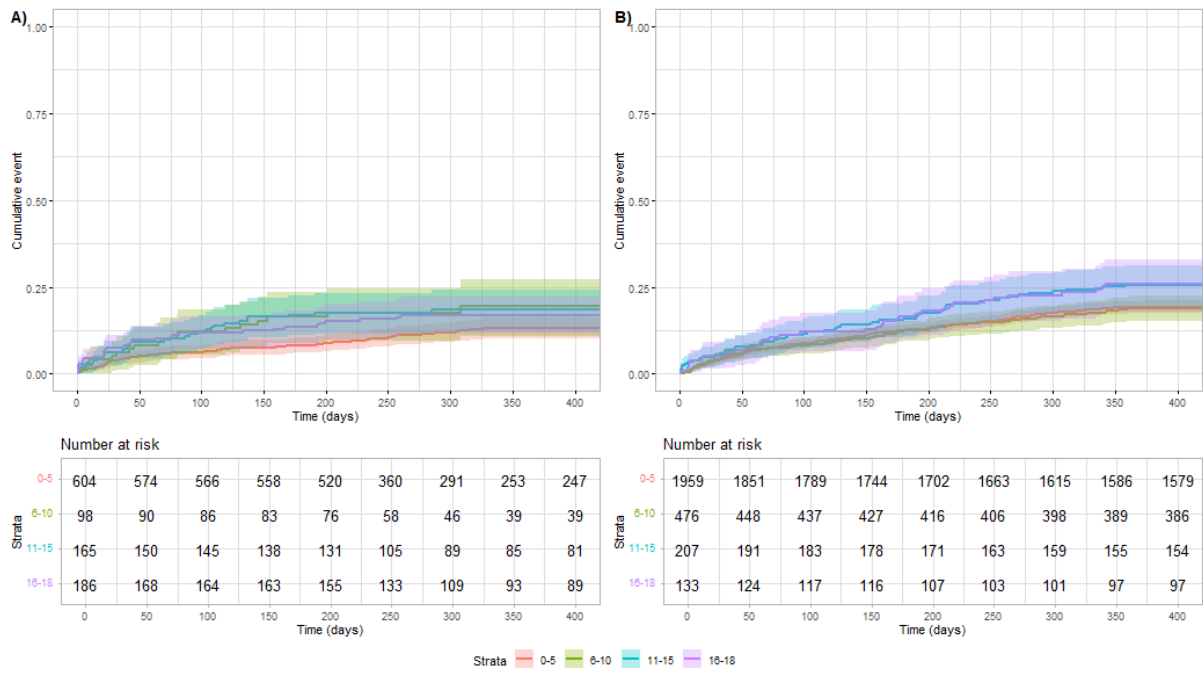

**Figure S4: Kaplan-Meier curves and corresponding 95% confidence intervals for probability of readmission for the number of medication groups within COVID- hospitalised (A) and Influenza-hospitalized (B) children.**

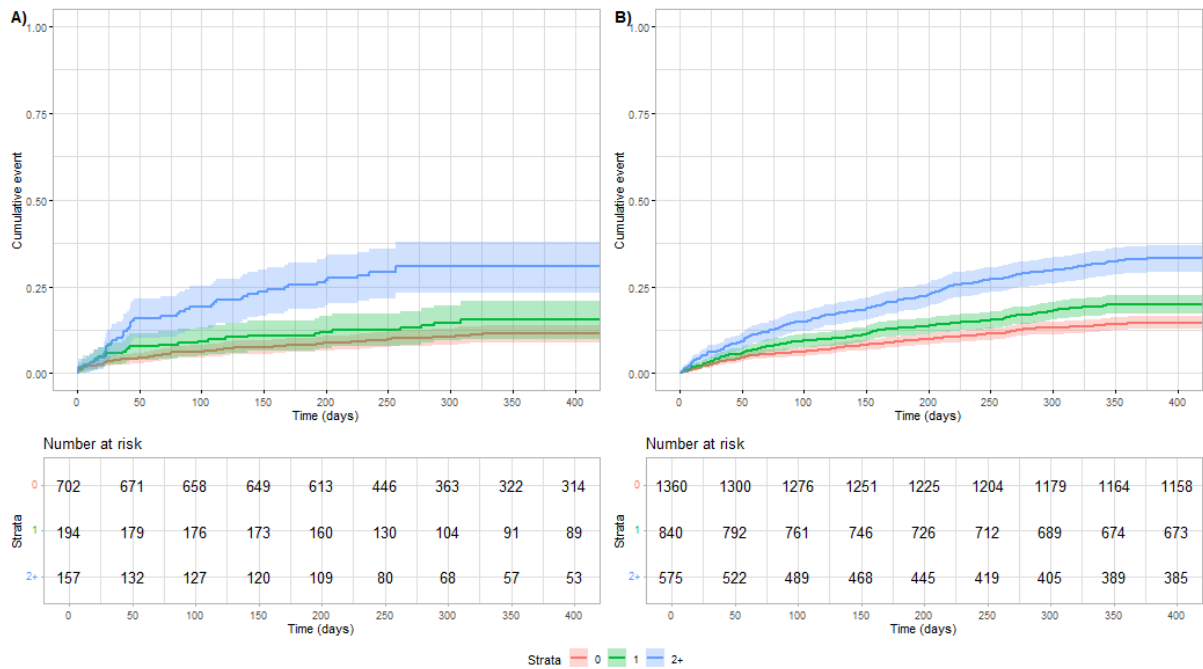

## Outcomes: short and long-term mortality

**Table S13** shows the hospital mortality and 30-day, 180-day, 1-year, and 1.5-year mortality rates for COVID- and Influenza-hospitalized patients and age-, sex- and region-matched controls separately for the four age groups and according to sex. Numbers are given for the overall patient and control cohorts.

**Table S14** shows hospital mortality and 30-day, 180-day, 1-year, and 1.5-year mortality rates for COVID- and Influenza-hospitalized patients and age-, sex- and region-matched controls separately for the four age groups and according to sex. Numbers are given for the overall patient and control cohorts, as well as for the propensity score-matched COVID and Influenza patients.

**Table S15** shows the hospital mortality and 30-day, 180-day, 1-year, and 1.5-year mortality rates for COVID-hospitalized patients and age-, sex- and region-matched controls separately for the four age groups, according to sex and the number of medication groups received (at least one medication from the corresponding medication group at least once in the year before COVID-19 hospitalisation). Numbers are given for the overall patient and control cohorts.

**Table S16** shows the hospital mortality and 30-day, 180-day, 1-year, and 1.5-year mortality rates for Influenza-hospitalized patients and age-, sex- and region-matched controls separately for the four age groups, according to sex and the number of medication groups received (at least one medication from the corresponding medication group at least once in the year before Influenza hospitalisation). Numbers are given for the overall patient and control cohorts.

**Table S13: Mortality for all COVID- and Influenza-patients and corresponding controls**

|        |       |          | COVID       |          |                |          | Influenza       |          |                |          |
|--------|-------|----------|-------------|----------|----------------|----------|-----------------|----------|----------------|----------|
|        |       |          | COVID (all) |          | Controls (all) |          | Influenza (all) |          | Controls (all) |          |
|        |       |          | Alive       | Dead     | Alive          | Dead     | Alive           | Dead     | Alive          | Dead     |
| Sex    | Age   | Time     | n (%)       | n (%)    | n (%)          | n (%)    | n (%)           | n (%)    | n (%)          | n (%)    |
| Male   | 0-5   | Hospital | 338 (99.71) | 1 (0.29) | 3373 (100)     | 0 (0.0)  | 1062 (99.91)    | 1 (0.09) | 10545 (99.99)  | 1 (0.01) |
|        |       | 30-day   | 338 (99.71) | 1 (0.29) | 3369 (99.88)   | 4 (0.12) | 1062 (99.91)    | 1 (0.09) | 10544 (99.98)  | 2 (0.02) |
|        |       | 180-day  | 338 (99.71) | 1 (0.29) | 3369 (99.88)   | 4 (0.12) | 1061 (99.81)    | 2 (0.19) | 10542 (99.96)  | 4 (0.04) |
|        |       | 1-year   | 172 (50.74) | 1 (0.29) | 1707 (50.61)   | 4 (0.12) | 1058 (99.53)    | 4 (0.38) | 10529 (99.84)  | 7 (0.07) |
|        |       | 1.5-year | 77 (22.71)  | 1 (0.29) | 767 (22.74)    | 4 (0.12) | 1058 (99.53)    | 4 (0.38) | 10528 (99.83)  | 8 (0.08) |
|        | 6-10  | Hospital | 42 (100)    | 0 (0.0)  | 430 (100)      | 0 (0.0)  | 270 (100)       | 0 (0.0)  | 2701 (100)     | 0 (0.0)  |
|        |       | 30-day   | 42 (100)    | 0 (0.0)  | 430 (100)      | 0 (0.0)  | 270 (100)       | 0 (0.0)  | 2701 (100)     | 0 (0.0)  |
|        |       | 180-day  | 42 (100)    | 0 (0.0)  | 430 (100)      | 0 (0.0)  | 270 (100)       | 0 (0.0)  | 2701 (100)     | 0 (0.0)  |
|        |       | 1-year   | 25 (59.52)  | 1 (2.38) | 270 (62.79)    | 0 (0.0)  | 270 (100)       | 0 (0.0)  | 2701 (100)     | 0 (0.0)  |
|        |       | 1.5-year | 13 (30.95)  | 1 (2.38) | 150 (34.88)    | 0 (0.0)  | 268 (99.26)     | 2 (0.74) | 2701 (100)     | 0 (0.0)  |
|        | 11-15 | Hospital | 79 (97.53)  | 2 (2.47) | 808 (100)      | 0 (0.0)  | 116 (100)       | 0 (0.0)  | 1160 (100)     | 0 (0.0)  |
|        |       | 30-day   | 79 (97.53)  | 2 (2.47) | 808 (100)      | 0 (0.0)  | 116 (100)       | 0 (0.0)  | 1160 (100)     | 0 (0.0)  |
|        |       | 180-day  | 79 (97.53)  | 2 (2.47) | 808 (100)      | 0 (0.0)  | 116 (100)       | 0 (0.0)  | 1160 (100)     | 0 (0.0)  |
|        |       | 1-year   | 57 (70.37)  | 2 (2.47) | 588 (72.77)    | 0 (0.0)  | 116 (100)       | 0 (0.0)  | 1160 (100)     | 0 (0.0)  |
|        |       | 1.5-year | 27 (33.33)  | 2 (2.47) | 270 (33.42)    | 0 (0.0)  | 115 (99.14)     | 1 (0.86) | 1160 (100)     | 0 (0.0)  |
|        | 16-18 | Hospital | 67 (95.71)  | 3 (4.29) | 697 (100)      | 0 (0.0)  | 63 (100)        | 0 (0.0)  | 628 (100)      | 0 (0.0)  |
|        |       | 30-day   | 68 (97.14)  | 2 (2.86) | 697 (100)      | 0 (0.0)  | 63 (100)        | 0 (0.0)  | 628 (100)      | 0 (0.0)  |
|        |       | 180-day  | 66 (94.29)  | 4 (5.71) | 696 (99.86)    | 1 (0.14) | 63 (100)        | 0 (0.0)  | 628 (100)      | 0 (0.0)  |
|        |       | 1-year   | 42 (60)     | 4 (5.71) | 427 (61.26)    | 1 (0.14) | 62 (98.41)      | 0 (0.0)  | 618 (98.41)    | 0 (0.0)  |
|        |       | 1.5-year | 22 (31.43)  | 4 (5.71) | 217 (31.13)    | 1 (0.14) | 62 (98.41)      | 0 (0.0)  | 618 (98.41)    | 0 (0.0)  |
| Female | 0-5   | Hospital | 266 (98.52) | 4 (1.48) | 2715 (100)     | 0 (0.0)  | 897 (99.89)     | 1 (0.11) | 8900 (100)     | 0 (0.0)  |
|        |       | 30-day   | 267 (98.89) | 3 (1.11) | 2714 (99.96)   | 1 (0.04) | 897 (99.89)     | 1 (0.11) | 8899 (99.99)   | 1 (0.01) |
|        |       | 180-day  | 266 (98.52) | 4 (1.48) | 2712 (99.89)   | 3 (0.11) | 897 (99.89)     | 1 (0.11) | 8898 (99.98)   | 2 (0.02) |
|        |       | 1-year   | 130 (48.15) | 4 (1.48) | 1331 (49.02)   | 3 (0.11) | 896 (99.78)     | 1 (0.11) | 8884 (99.82)   | 6 (0.07) |
|        |       | 1.5-year | 52 (19.26)  | 4 (1.48) | 538 (19.82)    | 3 (0.11) | 895 (99.67)     | 2 (0.22) | 8883 (99.81)   | 7 (0.08) |
|        | 6-10  | Hospital | 56 (100)    | 0 (0.0)  | 560 (100)      | 0 (0.0)  | 206 (98.1)      | 4 (1.9)  | 2091 (100)     | 0 (0.0)  |
|        |       | 30-day   | 56 (100)    | 0 (0.0)  | 560 (100)      | 0 (0.0)  | 206 (98.1)      | 4 (1.9)  | 2091 (100)     | 0 (0.0)  |
|        |       | 180-day  | 56 (100)    | 0 (0.0)  | 560 (100)      | 0 (0.0)  | 206 (98.1)      | 4 (1.9)  | 2091 (100)     | 0 (0.0)  |
|        |       | 1-year   | 28 (50)     | 0 (0.0)  | 280 (50)       | 0 (0.0)  | 206 (98.1)      | 4 (1.9)  | 2091 (100)     | 0 (0.0)  |
|        |       | 1.5-year | 14 (25)     | 0 (0.0)  | 140 (25)       | 0 (0.0)  | 206 (98.1)      | 4 (1.9)  | 2091 (100)     | 0 (0.0)  |
|        | 11-15 | Hospital | 86 (100)    | 0 (0.0)  | 858 (100)      | 0 (0.0)  | 91 (100)        | 0 (0.0)  | 909 (100)      | 0 (0.0)  |
|        |       | 30-day   | 86 (100)    | 0 (0.0)  | 858 (100)      | 0 (0.0)  | 91 (100)        | 0 (0.0)  | 909 (100)      | 0 (0.0)  |
|        |       | 180-day  | 86 (100)    | 0 (0.0)  | 858 (100)      | 0 (0.0)  | 91 (100)        | 0 (0.0)  | 909 (100)      | 0 (0.0)  |
|        |       | 1-year   | 49 (56.98)  | 0 (0.0)  | 489 (56.99)    | 0 (0.0)  | 91 (100)        | 0 (0.0)  | 909 (100)      | 0 (0.0)  |
|        |       | 1.5-year | 23 (26.74)  | 0 (0.0)  | 229 (26.69)    | 0 (0.0)  | 91 (100)        | 0 (0.0)  | 909 (100)      | 0 (0.0)  |
|        | 16-18 | Hospital | 119 (100)   | 0 (0.0)  | 1185 (100)     | 0 (0.0)  | 70 (100)        | 0 (0.0)  | 699 (100)      | 0 (0.0)  |
|        |       | 30-day   | 119 (100)   | 0 (0.0)  | 1185 (100)     | 0 (0.0)  | 70 (100)        | 0 (0.0)  | 699 (100)      | 0 (0.0)  |
|        |       | 180-day  | 119 (100)   | 0 (0.0)  | 1185 (100)     | 0 (0.0)  | 70 (100)        | 0 (0.0)  | 699 (100)      | 0 (0.0)  |
|        |       | 1-year   | 75 (63.03)  | 0 (0.0)  | 748 (63.12)    | 0 (0.0)  | 69 (98.57)      | 0 (0.0)  | 689 (98.57)    | 0 (0.0)  |
|        |       | 1.5-year | 42 (35.29)  | 0 (0.0)  | 420 (35.44)    | 0 (0.0)  | 69 (98.57)      | 0 (0.0)  | 689 (98.57)    | 0 (0.0)  |

**Table S14: Mortality for all COVID- and Influenza-patients before and after propensity score matching (PSM)**

|        |       |          | All patients |          |                 |          | Patients after PSM |          |                 |          |
|--------|-------|----------|--------------|----------|-----------------|----------|--------------------|----------|-----------------|----------|
|        |       |          | COVID (all)  |          | Influenza (all) |          | COVID (PSM)        |          | Influenza (PSM) |          |
|        |       |          | Alive        | Dead     | Alive           | Dead     | Alive              | Dead     | Alive           | Dead     |
| Sex    | Age   | Time     | n (%)        | n (%)    | n (%)           | n (%)    | n (%)              | n (%)    | n (%)           |          |
| Male   | 0-5   | Hospital | 338 (99.71)  | 1 (0.29) | 1062 (99.91)    | 1 (0.09) | 330 (99.7)         | 1 (0.3)  | 332 (99.7)      | 1 (0.3)  |
|        |       | 30-day   | 338 (99.71)  | 1 (0.29) | 1062 (99.91)    | 1 (0.09) | 330 (99.7)         | 1 (0.3)  | 332 (99.7)      | 1 (0.3)  |
|        |       | 180-day  | 338 (99.71)  | 1 (0.29) | 1061 (99.81)    | 2 (0.19) | 330 (99.7)         | 1 (0.3)  | 332 (99.7)      | 1 (0.3)  |
|        |       | 1-year   | 172 (50.74)  | 1 (0.29) | 1058 (99.53)    | 4 (0.38) | 168 (50.76)        | 1 (0.3)  | 331 (99.4)      | 1 (0.3)  |
|        |       | 1.5-year | 77 (22.71)   | 1 (0.29) | 1058 (99.53)    | 4 (0.38) | 76 (22.96)         | 1 (0.3)  | 331 (99.4)      | 1 (0.3)  |
|        | 6-10  | Hospital | 42 (100)     | 0 (0.0)  | 270 (100)       | 0 (0.0)  | 38 (100)           | 0 (0.0)  | 43 (100)        | 0 (0.0)  |
|        |       | 30-day   | 42 (100)     | 0 (0.0)  | 270 (100)       | 0 (0.0)  | 38 (100)           | 0 (0.0)  | 43 (100)        | 0 (0.0)  |
|        |       | 180-day  | 42 (100)     | 0 (0.0)  | 270 (100)       | 0 (0.0)  | 38 (100)           | 0 (0.0)  | 43 (100)        | 0 (0.0)  |
|        |       | 1-year   | 25 (59.52)   | 1 (2.38) | 270 (100)       | 0 (0.0)  | 25 (65.79)         | 0 (0.0)  | 43 (100)        | 0 (0.0)  |
|        |       | 1.5-year | 13 (30.95)   | 1 (2.38) | 268 (99.26)     | 2 (0.74) | 13 (34.21)         | 0 (0.0)  | 43 (100)        | 0 (0.0)  |
|        | 11-15 | Hospital | 79 (97.53)   | 2 (2.47) | 116 (100)       | 0 (0.0)  | 58 (100)           | 0 (0.0)  | 53 (100)        | 0 (0.0)  |
|        |       | 30-day   | 79 (97.53)   | 2 (2.47) | 116 (100)       | 0 (0.0)  | 58 (100)           | 0 (0.0)  | 53 (100)        | 0 (0.0)  |
|        |       | 180-day  | 79 (97.53)   | 2 (2.47) | 116 (100)       | 0 (0.0)  | 58 (100)           | 0 (0.0)  | 53 (100)        | 0 (0.0)  |
|        |       | 1-year   | 57 (70.37)   | 2 (2.47) | 116 (100)       | 0 (0.0)  | 42 (72.41)         | 0 (0.0)  | 53 (100)        | 0 (0.0)  |
|        |       | 1.5-year | 27 (33.33)   | 2 (2.47) | 115 (99.14)     | 1 (0.86) | 20 (34.48)         | 0 (0.0)  | 53 (100)        | 0 (0.0)  |
|        | 16-18 | Hospital | 67 (95.71)   | 3 (4.29) | 63 (100)        | 0 (0.0)  | 42 (97.67)         | 1 (2.33) | 37 (100)        | 0 (0.0)  |
|        |       | 30-day   | 68 (97.14)   | 2 (2.86) | 63 (100)        | 0 (0.0)  | 42 (97.67)         | 1 (2.33) | 37 (100)        | 0 (0.0)  |
|        |       | 180-day  | 66 (94.29)   | 4 (5.71) | 63 (100)        | 0 (0.0)  | 42 (97.67)         | 1 (2.33) | 37 (100)        | 0 (0.0)  |
|        |       | 1-year   | 42 (60)      | 4 (5.71) | 62 (98.41)      | 0 (0.0)  | 22 (51.16)         | 1 (2.33) | 36 (97.3)       | 0 (0.0)  |
|        |       | 1.5-year | 22 (31.43)   | 4 (5.71) | 62 (98.41)      | 0 (0.0)  | 13 (30.23)         | 1 (2.33) | 36 (97.3)       | 0 (0.0)  |
| Female | 0-5   | Hospital | 266 (98.52)  | 4 (1.48) | 897 (99.89)     | 1 (0.11) | 257 (99.61)        | 1 (0.39) | 265 (100)       | 0 (0.0)  |
|        |       | 30-day   | 267 (98.89)  | 3 (1.11) | 897 (99.89)     | 1 (0.11) | 257 (99.61)        | 1 (0.39) | 265 (100)       | 0 (0.0)  |
|        |       | 180-day  | 266 (98.52)  | 4 (1.48) | 897 (99.89)     | 1 (0.11) | 257 (99.61)        | 1 (0.39) | 265 (100)       | 0 (0.0)  |
|        |       | 1-year   | 130 (48.15)  | 4 (1.48) | 896 (99.78)     | 1 (0.11) | 127 (49.22)        | 1 (0.39) | 264 (99.62)     | 0 (0.0)  |
|        |       | 1.5-year | 52 (19.26)   | 4 (1.48) | 895 (99.67)     | 2 (0.22) | 51 (19.77)         | 1 (0.39) | 264 (99.62)     | 0 (0.0)  |
|        | 6-10  | Hospital | 56 (100)     | 0 (0.0)  | 206 (98.1)      | 4 (1.9)  | 52 (100)           | 0 (0.0)  | 54 (94.74)      | 3 (5.26) |
|        |       | 30-day   | 56 (100)     | 0 (0.0)  | 206 (98.1)      | 4 (1.9)  | 52 (100)           | 0 (0.0)  | 54 (94.74)      | 3 (5.26) |
|        |       | 180-day  | 56 (100)     | 0 (0.0)  | 206 (98.1)      | 4 (1.9)  | 52 (100)           | 0 (0.0)  | 54 (94.74)      | 3 (5.26) |
|        |       | 1-year   | 28 (50)      | 0 (0.0)  | 206 (98.1)      | 4 (1.9)  | 26 (50)            | 0 (0.0)  | 54 (94.74)      | 3 (5.26) |
|        |       | 1.5-year | 14 (25)      | 0 (0.0)  | 206 (98.1)      | 4 (1.9)  | 13 (25)            | 0 (0.0)  | 54 (94.74)      | 3 (5.26) |
|        | 11-15 | Hospital | 86 (100)     | 0 (0.0)  | 91 (100)        | 0 (0.0)  | 61 (100)           | 0 (0.0)  | 56 (100)        | 0 (0.0)  |
|        |       | 30-day   | 86 (100)     | 0 (0.0)  | 91 (100)        | 0 (0.0)  | 61 (100)           | 0 (0.0)  | 56 (100)        | 0 (0.0)  |
|        |       | 180-day  | 86 (100)     | 0 (0.0)  | 91 (100)        | 0 (0.0)  | 61 (100)           | 0 (0.0)  | 56 (100)        | 0 (0.0)  |
|        |       | 1-year   | 49 (56.98)   | 0 (0.0)  | 91 (100)        | 0 (0.0)  | 34 (55.74)         | 0 (0.0)  | 56 (100)        | 0 (0.0)  |
|        |       | 1.5-year | 23 (26.74)   | 0 (0.0)  | 91 (100)        | 0 (0.0)  | 17 (27.87)         | 0 (0.0)  | 56 (100)        | 0 (0.0)  |
|        | 16-18 | Hospital | 119 (100)    | 0 (0.0)  | 70 (100)        | 0 (0.0)  | 55 (100)           | 0 (0.0)  | 52 (100)        | 0 (0.0)  |
|        |       | 30-day   | 119 (100)    | 0 (0.0)  | 70 (100)        | 0 (0.0)  | 55 (100)           | 0 (0.0)  | 52 (100)        | 0 (0.0)  |
|        |       | 180-day  | 119 (100)    | 0 (0.0)  | 70 (100)        | 0 (0.0)  | 55 (100)           | 0 (0.0)  | 52 (100)        | 0 (0.0)  |
|        |       | 1-year   | 75 (63.03)   | 0 (0.0)  | 69 (98.57)      | 0 (0.0)  | 33 (60)            | 0 (0.0)  | 51 (98.08)      | 0 (0.0)  |
|        |       | 1.5-year | 42 (35.29)   | 0 (0.0)  | 69 (98.57)      | 0 (0.0)  | 17 (30.91)         | 0 (0.0)  | 51 (98.08)      | 0 (0.0)  |

**Table S15: Mortality for all COVID-patients and controls by number of medication groups received.**

|        |       |          | COVID Patients |       |          |         | Controls (all) |          |       |       |         |
|--------|-------|----------|----------------|-------|----------|---------|----------------|----------|-------|-------|---------|
|        |       |          | 0              | 1     | 2-5      | > 5     | 0              | 1        | 2-5   | > 5   |         |
| Sex    | Age   |          | n (%)          | n (%) | n (%)    | n (%)   | n (%)          | n (%)    | n (%) | n (%) |         |
| Male   | 0-5   | Hospital | 1 (0.36)       | 0 (0) | 0 (0)    | 0 (0)   | 0 (0)          | 0 (0)    | 0 (0) | 0 (0) | 0 (0)   |
|        |       | 30-day   | 1 (0.36)       | 0 (0) | 0 (0)    | 0 (0)   | 4 (0.14)       | 0 (0)    | 0 (0) | 0 (0) | 0 (0)   |
|        |       | 180-day  | 1 (0.36)       | 0 (0) | 0 (0)    | 0 (0)   | 4 (0.14)       | 0 (0)    | 0 (0) | 0 (0) | 0 (0)   |
|        |       | 1-year   | 1 (0.36)       | 0 (0) | 0 (0)    | 0 (0)   | 4 (0.14)       | 0 (0)    | 0 (0) | 0 (0) | 0 (0)   |
|        |       | 1.5-year | 1 (0.36)       | 0 (0) | 0 (0)    | 0 (0)   | 4 (0.14)       | 0 (0)    | 0 (0) | 0 (0) | 0 (0)   |
|        | 6-10  | Hospital | 0 (0)          | 0 (0) | 0 (0)    | 0 (0)   | 0 (0)          | 0 (0)    | 0 (0) | 0 (0) | 0 (0.0) |
|        |       | 30-day   | 0 (0)          | 0 (0) | 0 (0)    | 0 (0)   | 0 (0)          | 0 (0)    | 0 (0) | 0 (0) | 0 (0.0) |
|        |       | 180-day  | 0 (0)          | 0 (0) | 0 (0)    | 0 (0)   | 0 (0)          | 0 (0)    | 0 (0) | 0 (0) | 0 (0.0) |
|        |       | 1-year   | 0 (0)          | 0 (0) | 0 (0)    | 1 (100) | 0 (0)          | 0 (0)    | 0 (0) | 0 (0) | 0 (0.0) |
|        |       | 1.5-year | 0 (0)          | 0 (0) | 0 (0)    | 1 (100) | 0 (0)          | 0 (0)    | 0 (0) | 0 (0) | 0 (0.0) |
|        | 11-15 | Hospital | 0 (0)          | 0 (0) | 1 (5)    | 1 (50)  | 0 (0)          | 0 (0)    | 0 (0) | 0 (0) | 0 (0)   |
|        |       | 30-day   | 0 (0)          | 0 (0) | 1 (5)    | 1 (50)  | 0 (0)          | 0 (0)    | 0 (0) | 0 (0) | 0 (0)   |
|        |       | 180-day  | 0 (0)          | 0 (0) | 1 (5)    | 1 (50)  | 0 (0)          | 0 (0)    | 0 (0) | 0 (0) | 0 (0)   |
|        |       | 1-year   | 0 (0)          | 0 (0) | 1 (5)    | 1 (50)  | 0 (0)          | 0 (0)    | 0 (0) | 0 (0) | 0 (0)   |
|        |       | 1.5-year | 0 (0)          | 0 (0) | 1 (5)    | 1 (50)  | 0 (0)          | 0 (0)    | 0 (0) | 0 (0) | 0 (0)   |
|        | 16-18 | Hospital | 2 (5.13)       | 0 (0) | 1 (5.88) | 0 (0)   | 0 (0)          | 0 (0)    | 0 (0) | 0 (0) | 0 (0)   |
|        |       | 30-day   | 1 (2.56)       | 0 (0) | 1 (5.88) | 0 (0)   | 0 (0)          | 0 (0)    | 0 (0) | 0 (0) | 0 (0)   |
|        |       | 180-day  | 2 (5.13)       | 0 (0) | 1 (5.88) | 1 (100) | 0 (0)          | 1 (0.81) | 0 (0) | 0 (0) | 0 (0)   |
|        |       | 1-year   | 2 (5.13)       | 0 (0) | 1 (5.88) | 1 (100) | 0 (0)          | 1 (0.81) | 0 (0) | 0 (0) | 0 (0)   |
|        |       | 1.5-year | 2 (5.13)       | 0 (0) | 1 (5.88) | 1 (100) | 0 (0)          | 1 (0.81) | 0 (0) | 0 (0) | 0 (0)   |
| Female | 0-5   | Hospital | 0 (0)          | 0 (0) | 2 (8)    | 2 (100) | 0 (0)          | 0 (0)    | 0 (0) | 0 (0) | 0 (0)   |
|        |       | 30-day   | 0 (0)          | 0 (0) | 1 (4)    | 2 (100) | 1 (0.04)       | 0 (0)    | 0 (0) | 0 (0) | 0 (0)   |
|        |       | 180-day  | 0 (0)          | 0 (0) | 2 (8)    | 2 (100) | 3 (0.13)       | 0 (0)    | 0 (0) | 0 (0) | 0 (0)   |
|        |       | 1-year   | 0 (0)          | 0 (0) | 2 (8)    | 2 (100) | 3 (0.13)       | 0 (0)    | 0 (0) | 0 (0) | 0 (0)   |
|        |       | 1.5-year | 0 (0)          | 0 (0) | 2 (8)    | 2 (100) | 3 (0.13)       | 0 (0)    | 0 (0) | 0 (0) | 0 (0)   |
|        | 6-10  | Hospital | 0 (0)          | 0 (0) | 0 (0)    | 0 (0.0) | 0 (0)          | 0 (0)    | 0 (0) | 0 (0) | 0 (0)   |
|        |       | 30-day   | 0 (0)          | 0 (0) | 0 (0)    | 0 (0.0) | 0 (0)          | 0 (0)    | 0 (0) | 0 (0) | 0 (0)   |
|        |       | 180-day  | 0 (0)          | 0 (0) | 0 (0)    | 0 (0.0) | 0 (0)          | 0 (0)    | 0 (0) | 0 (0) | 0 (0)   |
|        |       | 1-year   | 0 (0)          | 0 (0) | 0 (0)    | 0 (0.0) | 0 (0)          | 0 (0)    | 0 (0) | 0 (0) | 0 (0)   |
|        |       | 1.5-year | 0 (0)          | 0 (0) | 0 (0)    | 0 (0.0) | 0 (0)          | 0 (0)    | 0 (0) | 0 (0) | 0 (0)   |
|        | 11-15 | Hospital | 0 (0)          | 0 (0) | 0 (0)    | 0 (0)   | 0 (0)          | 0 (0)    | 0 (0) | 0 (0) | 0 (0)   |
|        |       | 30-day   | 0 (0)          | 0 (0) | 0 (0)    | 0 (0)   | 0 (0)          | 0 (0)    | 0 (0) | 0 (0) | 0 (0)   |
|        |       | 180-day  | 0 (0)          | 0 (0) | 0 (0)    | 0 (0)   | 0 (0)          | 0 (0)    | 0 (0) | 0 (0) | 0 (0)   |
|        |       | 1-year   | 0 (0)          | 0 (0) | 0 (0)    | 0 (0)   | 0 (0)          | 0 (0)    | 0 (0) | 0 (0) | 0 (0)   |
|        |       | 1.5-year | 0 (0)          | 0 (0) | 0 (0)    | 0 (0)   | 0 (0)          | 0 (0)    | 0 (0) | 0 (0) | 0 (0)   |
|        | 16-18 | Hospital | 0 (0)          | 0 (0) | 0 (0)    | 0 (0)   | 0 (0)          | 0 (0)    | 0 (0) | 0 (0) | 0 (0)   |
|        |       | 30-day   | 0 (0)          | 0 (0) | 0 (0)    | 0 (0)   | 0 (0)          | 0 (0)    | 0 (0) | 0 (0) | 0 (0)   |
|        |       | 180-day  | 0 (0)          | 0 (0) | 0 (0)    | 0 (0)   | 0 (0)          | 0 (0)    | 0 (0) | 0 (0) | 0 (0)   |
|        |       | 1-year   | 0 (0)          | 0 (0) | 0 (0)    | 0 (0)   | 0 (0)          | 0 (0)    | 0 (0) | 0 (0) | 0 (0)   |
|        |       | 1.5-year | 0 (0)          | 0 (0) | 0 (0)    | 0 (0)   | 0 (0)          | 0 (0)    | 0 (0) | 0 (0) | 0 (0)   |



**Table S16: Mortality for all Influenza-patients and controls by number of medication groups received.**

|        |       |          | Influenza  |            |              |              | Control    |            |              |              |
|--------|-------|----------|------------|------------|--------------|--------------|------------|------------|--------------|--------------|
| Sex    | Age   |          | 0<br>n (%) | 1<br>n (%) | 2-5<br>n (%) | > 5<br>n (%) | 0<br>n (%) | 1<br>n (%) | 2-5<br>n (%) | > 5<br>n (%) |
| Male   | 0-5   | Hospital | 0 (0)      | 0 (0)      | 1 (0.48)     | 0 (0)        | 1 (0.01)   | 0 (0)      | 0 (0)        | 0 (0)        |
|        |       | 30-day   | 0 (0)      | 0 (0)      | 1 (0.48)     | 0 (0)        | 2 (0.03)   | 0 (0)      | 0 (0)        | 0 (0)        |
|        |       | 180-day  | 0 (0)      | 1 (0.34)   | 1 (0.48)     | 0 (0)        | 4 (0.05)   | 0 (0)      | 0 (0)        | 0 (0)        |
|        |       | 1-year   | 1 (0.18)   | 2 (0.68)   | 1 (0.48)     | 0 (0)        | 7 (0.1)    | 0 (0)      | 0 (0)        | 0 (0)        |
|        |       | 1.5-year | 1 (0.18)   | 2 (0.68)   | 1 (0.48)     | 0 (0)        | 7 (0.1)    | 1 (0.05)   | 0 (0)        | 0 (0)        |
|        | 6-10  | Hospital | 0 (0)      | 0 (0)      | 0 (0)        | 0 (0)        | 0 (0)      | 0 (0)      | 0 (0)        | 0 (0)        |
|        |       | 30-day   | 0 (0)      | 0 (0)      | 0 (0)        | 0 (0)        | 0 (0)      | 0 (0)      | 0 (0)        | 0 (0)        |
|        |       | 180-day  | 0 (0)      | 0 (0)      | 0 (0)        | 0 (0)        | 0 (0)      | 0 (0)      | 0 (0)        | 0 (0)        |
|        |       | 1-year   | 0 (0)      | 0 (0)      | 0 (0)        | 0 (0)        | 0 (0)      | 0 (0)      | 0 (0)        | 0 (0)        |
|        |       | 1.5-year | 0 (0)      | 0 (0)      | 1 (1.82)     | 1 (16.67)    | 0 (0)      | 0 (0)      | 0 (0)        | 0 (0)        |
|        | 11-15 | Hospital | 0 (0)      | 0 (0)      | 0 (0)        | 0 (0.0)      | 0 (0)      | 0 (0)      | 0 (0)        | 0 (0)        |
|        |       | 30-day   | 0 (0)      | 0 (0)      | 0 (0)        | 0 (0.0)      | 0 (0)      | 0 (0)      | 0 (0)        | 0 (0)        |
|        |       | 180-day  | 0 (0)      | 0 (0)      | 0 (0)        | 0 (0.0)      | 0 (0)      | 0 (0)      | 0 (0)        | 0 (0)        |
|        |       | 1-year   | 0 (0)      | 0 (0)      | 0 (0)        | 0 (0.0)      | 0 (0)      | 0 (0)      | 0 (0)        | 0 (0)        |
|        |       | 1.5-year | 0 (0)      | 0 (0)      | 1 (3.03)     | 0 (0.0)      | 0 (0)      | 0 (0)      | 0 (0)        | 0 (0)        |
|        | 16-18 | Hospital | 0 (0)      | 0 (0)      | 0 (0)        | 0 (0.0)      | 0 (0)      | 0 (0)      | 0 (0)        | 0 (0)        |
|        |       | 30-day   | 0 (0)      | 0 (0)      | 0 (0)        | 0 (0.0)      | 0 (0)      | 0 (0)      | 0 (0)        | 0 (0)        |
|        |       | 180-day  | 0 (0)      | 0 (0)      | 0 (0)        | 0 (0.0)      | 0 (0)      | 0 (0)      | 0 (0)        | 0 (0)        |
|        |       | 1-year   | 0 (0)      | 0 (0)      | 0 (0)        | 0 (0.0)      | 0 (0)      | 0 (0)      | 0 (0)        | 0 (0)        |
|        |       | 1.5-year | 0 (0)      | 0 (0)      | 0 (0)        | 0 (0.0)      | 0 (0)      | 0 (0)      | 0 (0)        | 0 (0)        |
| Female | 0-5   | Hospital | 0 (0)      | 0 (0)      | 0 (0)        | 1 (33.33)    | 0 (0)      | 0 (0)      | 0 (0)        | 0 (0)        |
|        |       | 30-day   | 0 (0)      | 0 (0)      | 0 (0)        | 1 (33.33)    | 1 (0.02)   | 0 (0)      | 0 (0)        | 0 (0)        |
|        |       | 180-day  | 0 (0)      | 0 (0)      | 0 (0)        | 1 (33.33)    | 2 (0.03)   | 0 (0)      | 0 (0)        | 0 (0)        |
|        |       | 1-year   | 0 (0)      | 0 (0)      | 0 (0)        | 1 (33.33)    | 6 (0.1)    | 0 (0)      | 0 (0)        | 0 (0)        |
|        |       | 1.5-year | 0 (0)      | 1 (0.36)   | 0 (0)        | 1 (33.33)    | 7 (0.11)   | 0 (0)      | 0 (0)        | 0 (0)        |
|        | 6-10  | Hospital | 0 (0)      | 1 (1.32)   | 2 (4.55)     | 1 (33.33)    | 0 (0)      | 0 (0)      | 0 (0)        | 0 (0)        |
|        |       | 30-day   | 0 (0)      | 1 (1.32)   | 2 (4.55)     | 1 (33.33)    | 0 (0)      | 0 (0)      | 0 (0)        | 0 (0)        |
|        |       | 180-day  | 0 (0)      | 1 (1.32)   | 2 (4.55)     | 1 (33.33)    | 0 (0)      | 0 (0)      | 0 (0)        | 0 (0)        |
|        |       | 1-year   | 0 (0)      | 1 (1.32)   | 2 (4.55)     | 1 (33.33)    | 0 (0)      | 0 (0)      | 0 (0)        | 0 (0)        |
|        |       | 1.5-year | 0 (0)      | 1 (1.32)   | 2 (4.55)     | 1 (33.33)    | 0 (0)      | 0 (0)      | 0 (0)        | 0 (0)        |
|        | 11-15 | Hospital | 0 (0)      | 0 (0)      | 0 (0)        | 0 (0)        | 0 (0)      | 0 (0)      | 0 (0)        | 0 (0)        |
|        |       | 30-day   | 0 (0)      | 0 (0)      | 0 (0)        | 0 (0)        | 0 (0)      | 0 (0)      | 0 (0)        | 0 (0)        |
|        |       | 180-day  | 0 (0)      | 0 (0)      | 0 (0)        | 0 (0)        | 0 (0)      | 0 (0)      | 0 (0)        | 0 (0)        |
|        |       | 1-year   | 0 (0)      | 0 (0)      | 0 (0)        | 0 (0)        | 0 (0)      | 0 (0)      | 0 (0)        | 0 (0)        |
|        |       | 1.5-year | 0 (0)      | 0 (0)      | 0 (0)        | 0 (0)        | 0 (0)      | 0 (0)      | 0 (0)        | 0 (0)        |
|        | 16-18 | Hospital | 0 (0)      | 0 (0)      | 0 (0)        | 0 (0)        | 0 (0)      | 0 (0)      | 0 (0)        | 0 (0)        |
|        |       | 30-day   | 0 (0)      | 0 (0)      | 0 (0)        | 0 (0)        | 0 (0)      | 0 (0)      | 0 (0)        | 0 (0)        |
|        |       | 180-day  | 0 (0)      | 0 (0)      | 0 (0)        | 0 (0)        | 0 (0)      | 0 (0)      | 0 (0)        | 0 (0)        |
|        |       | 1-year   | 0 (0)      | 0 (0)      | 0 (0)        | 0 (0)        | 0 (0)      | 0 (0)      | 0 (0)        | 0 (0)        |
|        |       | 1.5-year | 0 (0)      | 0 (0)      | 0 (0)        | 0 (0)        | 0 (0)      | 0 (0)      | 0 (0)        | 0 (0)        |
